# 1 Mapping the dynamics of epigenetic adaptation during 2 heterochromatin misregulation

3 Ajay Larkin<sup>1,5</sup>, Colin Kunze<sup>2,3,5</sup>, Melissa Seman<sup>1</sup>, Alexander Levashkevich<sup>1</sup>, Justin Curran<sup>1</sup>,  
4 Dionysus Morris-Evans<sup>1</sup>, Sophia Lemieux<sup>1</sup>, Ahmad S. Khalil<sup>2,3,4\*</sup>, and Kaushik Ragunathan<sup>1\*</sup>

5  
6 <sup>1</sup>Department of Biology, Brandeis University, Waltham, MA 02453

7 <sup>2</sup>Biological Design Center, Boston University, Boston, MA 02215, USA

8 <sup>3</sup>Department of Biomedical Engineering, Boston University, Boston, MA 02215, USA

9 <sup>4</sup>Wyss Institute for Biologically Inspired Engineering, Harvard University, Boston, MA 02115 USA

10 <sup>5</sup>These authors contributed equally

11 \*Correspondence: [kaushikr@brandeis.edu](mailto:kaushikr@brandeis.edu) (K.R.), [khalil@bu.edu](mailto:khalil@bu.edu) (A.S.K.)

12

13

14

15

16

17

18

19

20

21

## 22 **SUMMARY**

23           A classical and well-established mechanism that enables cells to adapt to new and  
24 adverse conditions is the acquisition of beneficial genetic mutations. Much less is known  
25 about epigenetic mechanisms that allow cells to develop novel and adaptive phenotypes  
26 without altering their genetic blueprint. It has been recently proposed that histone  
27 modifications, such as heterochromatin-defining H3K9 methylation (H3K9me), normally  
28 reserved to maintain genome integrity, can be redistributed across the genome to establish  
29 new and potentially adaptive phenotypes. To uncover the dynamics of this process, we  
30 developed a precision engineered genetic approach to trigger H3K9me redistribution on-  
31 demand in fission yeast. This enabled us to trace genome-scale RNA and chromatin  
32 changes over time prior to and during adaptation in long-term continuous cultures.  
33 Establishing adaptive H3K9me occurs over remarkably slow time-scales relative to the  
34 initiating stress. During this time, we captured dynamic H3K9me redistribution events  
35 ultimately leading to cells converging on an optimal adaptive solution. Upon removal of  
36 stress, cells relax to new transcriptional and chromatin states rather than revert to their initial  
37 (ground) state, establishing a tunable memory for a future adaptive epigenetic response.  
38 Collectively, our tools uncover the slow kinetics of epigenetic adaptation that allow cells to  
39 search for and heritably encode adaptive solutions, with implications for drug resistance and  
40 response to infection.

41

42

43

44

45

## 46 INTRODUCTION

47           Adaptation enables cells to survive new or changing environments by establishing  
48 novel phenotypes that enhance cell fitness.<sup>1,2</sup> These processes are dynamic and constantly  
49 reshape how organisms respond to a wide range of physiological contexts that includes how  
50 cells in our body respond to infections, cancer cells react to chemotherapeutic agents, and  
51 the emerging threat of antibiotic and antifungal resistance amongst microbes.<sup>3-5</sup> One major  
52 mechanism that cells leverage to acquire new phenotypes is altering their DNA sequence  
53 through genetic mutations.<sup>6</sup> Although beneficial mutations in populations are rare, cells that  
54 acquire such mutations will eventually outcompete those that fail to adapt.<sup>7,8</sup> However,  
55 genetic mutations represent an inflexible commitment to a new environment that cannot be  
56 reversed following a return to cellular homeostasis.<sup>9,10</sup> Furthermore, it is well known that  
57 genetic adaptation to one condition is often associated with a fitness loss in other  
58 environments and hence such changes may represent sub-optimal and terminal solutions  
59 amidst fluctuating environments.<sup>11</sup>

60           An alternative is epigenetic adaptation, whereby cells acquire new phenotypes  
61 without any changes to their genetic blueprint.<sup>12</sup> While genetic mutations are irreversible,  
62 epigenetic changes can buffer against deleterious mutations without compromising the  
63 overall fitness of the cell.<sup>11,13</sup> In principle, this strategy offers a dynamic, reversible, and  
64 flexible form of adaptation well-suited to rapidly changing environmental conditions  
65 especially when such conditions persist only for a few generations.<sup>14-16</sup> Moreover, due to the  
66 flexibility of this mode of adaptation, epigenetic changes often pose serious clinical  
67 challenges during the evolution of chemotherapy resistance in cancer cells or the  
68 widespread emergence of antifungal resistance.<sup>17-21,21</sup> Thus, understanding how cells  
69 leverage adaptive epigenetic mechanisms and targeting such pathways can help us achieve  
70 improved clinical outcomes.

71           One known example of epigenetic adaptation is prion switching in yeast. In particular,  
72 the [*PSI*<sup>+</sup>] prion is the aggregated, self-propagating form of the yeast translation-termination

73 factor Sup35.<sup>22,23</sup> Upon switching to the prion form, the [*PS<sup>+</sup>*] prion sequesters soluble  
74 (active) Sup35, thereby uncovering previously cryptic genetic variation by promoting  
75 genome-wide translation readthrough. Hence, a latent, aggregation-prone, conformational  
76 state, when unleashed, can enable cells to acquire novel and heritable phenotypes that may  
77 be beneficial in unanticipated conditions. Can other epigenetic pathways be similarly  
78 leveraged in an on-demand fashion to unravel latent, heritable, and adaptive phenotypes?

79         Several lines of evidence suggest that cells have the capacity to alter their  
80 transcriptomes in response to stress through stochastic changes in transcription, alterations  
81 in chromatin accessibility, rewiring existing regulatory networks, and orchestrating wholesale  
82 changes in histone modification states.<sup>18,24–30</sup> Moreover, recent work has shown that diverse  
83 histone modifications with other canonical functions may have adaptive potential by being  
84 dynamically redistributed to new genomic loci under different stress conditions.<sup>19–21</sup> How  
85 cells exploit these heritable, chromatin-based epigenetic programs to discover genes that  
86 can be activated or repressed to enhance fitness and survival remains mysterious.

87         To achieve successful adaptation, the dynamic redistribution of histone modifications  
88 must in principle meet three critical requirements. The first requirement involves spatial  
89 changes in modification states, either through spreading from existing sites or the formation  
90 of new islands at novel locations in the genome. This is critical for cells to be able to sample  
91 which genes to silence or activate. The second requirement demands that the resulting  
92 histone modification-dependent changes in gene expression benefit cells in their new  
93 environment.<sup>31</sup> This process ensures that any optimal adaptive solution that cells make is  
94 stably maintained within the population. Lastly, the new cell state should be heritable across  
95 multiple generations so that cells are prepared to more rapidly respond to a future instance  
96 of being exposed to the initiating stress.<sup>32–36</sup> Thus, to faithfully map epigenetic adaptation  
97 pathways, it is necessary to reconstruct these highly dynamic processes and be able to  
98 connect genome-wide changes at the RNA and chromatin levels with cell fitness prior to and  
99 following adaptation.

100 To reconstruct these dynamics, we developed an experimental system based on the  
101 fission yeast, *Schizosaccharomyces pombe*. In *S. pombe*, H3K9 methylation (H3K9me)  
102 specifies silent epigenetic states otherwise referred to as heterochromatin.<sup>37</sup> Although  
103 heterochromatin normally resides at regulatory regions of the genome, such as centromeres  
104 and telomeres, H3K9me can also be deployed to downregulate novel targets.<sup>38–46</sup> One  
105 example of an acute stress in *S.pombe* that elicits an adaptive epigenetic response is so-  
106 called “heterochromatin misregulation”. Deleting two major H3K9me antagonists – the  
107 H3K14 histone acetyltransferase Mst2 and the putative H3K9 demethylase Epe1 – leads to  
108 the adaptive silencing of the sole H3K9 methyltransferase, Clr4, suppressing aberrant  
109 genome wide H3K9 methylation and restoring fitness.<sup>47</sup> We reasoned that this system would  
110 provide an ideal, minimal, and genetically pliable framework to induce heterochromatin  
111 misregulation and unveil the sequence of events that occur prior to adaptation.

112 Using synthetic biology, we developed a precision genetic approach to trigger and  
113 release heterochromatin misregulation on-demand.<sup>48,49</sup> Taking inspiration from laboratory  
114 evolution experiments, which have been powerful in defining genetic adaptations in microbial  
115 populations grown under selective pressure, we coupled this ability to induce  
116 heterochromatin misregulation with advanced continuous culture methods that allow us to  
117 quantify cell fitness in real-time and identify causal genome-wide transcriptional and  
118 chromatin-state changes.<sup>50</sup> Our inducible experimental system is a significant departure from  
119 previous studies that focused primarily on beginning and end-state measurements.<sup>21</sup> By  
120 quantifying cell-fitness in yeast populations, we could precisely trace the time evolution of  
121 the adaptive silencing program under multiple cycles of heterochromatin stress and  
122 recovery. Our approach uncovers how cells can redistribute H3K9me, records network-level  
123 changes in transcription, and defines how this dynamic interplay unlocks cryptic epigenetic  
124 variation to enable cell survival under conditions of acute stress. In summary, our study  
125 captures key features of how cells turn an existing regulatory pathway that normally ensures

126 H3K9 methylation is deposited only at constitutive sites into an adaptive mechanism with  
127 implications for drug resistance and response to infection.

## 128 RESULTS

### 129 An inducible Epe1 depletion system to trigger heterochromatin misregulation on- 130 demand

131 Epe1, a putative H3K9 demethylase, and Mst2, an H3K14 acetyltransferase, have  
132 additive roles in regulating *S.pombe* heterochromatin. Deleting both Epe1 and Mst2 leads to  
133 acute heterochromatin misregulation, which in turn promotes an adaptive epigenetic  
134 response.<sup>47</sup> We first confirmed previously published results by generating *mst2Δ epe1Δ*  
135 cells, which successfully adapted by silencing the H3K9 methyltransferase, Clr4. We  
136 measured an approximately ~4 fold decrease in Clr4 mRNA levels and the establishment of  
137 adaptive H3K9me2 at the *clr4+* locus (**Figure S1A-C**).

138 Since genetic deletions can only provide an endpoint phenotypic output, we sought to  
139 design a system for triggering heterochromatin misregulation on-demand by inducibly,  
140 rapidly, and thoroughly depleting Epe1. In principle, such a system would enable us to  
141 observe in real-time how cells respond to the induction of acute heterochromatin  
142 misregulation and dynamically trace adaptive pathways. We designed a system to control  
143 Epe1 protein production at two levels: 1) we replaced the endogenous *epe1+* promoter with  
144 a thiamine-repressible promoter (*nmt81*) such that addition of thiamine represses mRNA  
145 transcription and 2) we fused an auxin inducible degron tag to the C-terminus of Epe1 to  
146 trigger protein degradation. We refer to this inducibly degradable Epe1 allele as *epe1<sup>deg</sup>*  
147 (**Figure 1A**).<sup>48,49</sup> Adding thiamine to cells grown in liquid media caused a rapid 8-fold  
148 reduction in Epe1 mRNA levels which, when combined with naphthaleneacetic acid (NAA; a  
149 synthetic auxin analog), led to the absence of any detectable Epe1 protein in as little as 30  
150 minutes (**Figure 1B-C**). Thus, Epe1 depletion rapidly leads to negligible protein and  
151 transcript levels in less than an hour of exposure to NAA and thiamine.

A

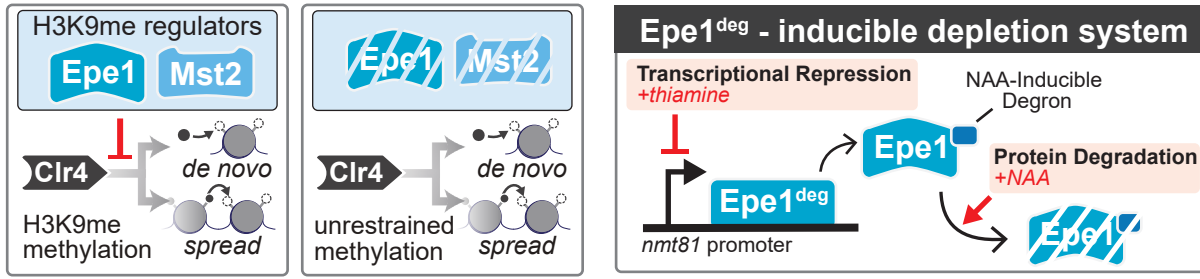

B

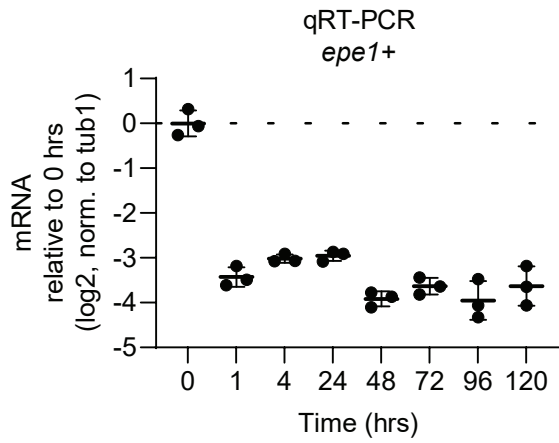

C

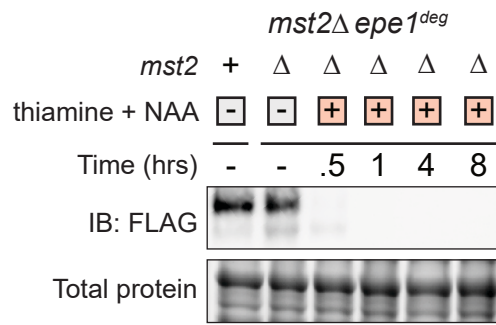

D

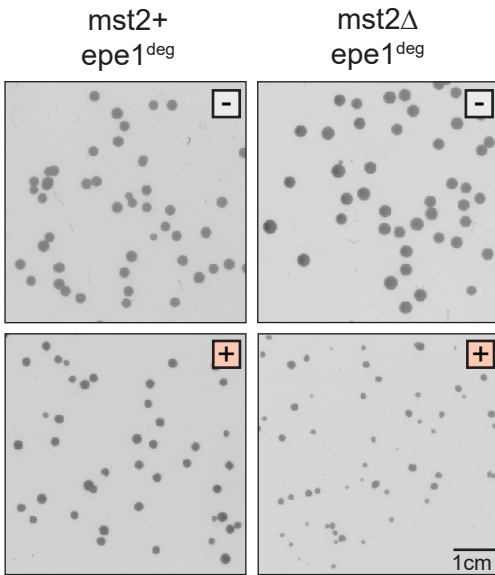

E

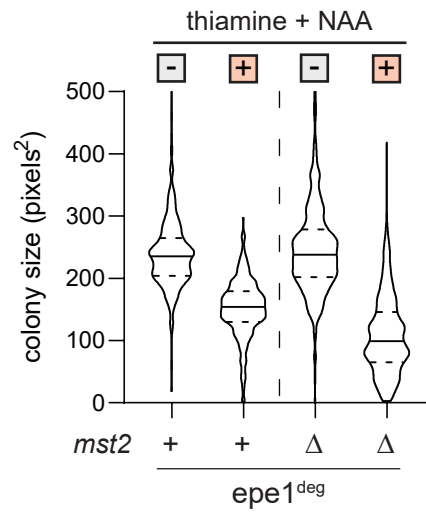

F

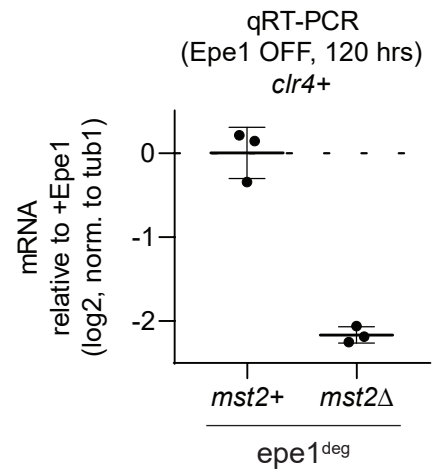

## Figure 1. An inducible Epe1 depletion system to trigger heterochromatin misregulation on-demand.

- (A) Epe1 and Mst2 regulate H3K9me deposition catalyzed by the H3K9 methyltransferase, Clr4 in *S.pombe*. (Left) Epe1 and Mst2 prevent uncontrolled H3K9me spreading. The absence of Mst2 and Epe1 triggers heterochromatin misregulation. (Right) Construction of a precision-engineered genetic approach to toggle Epe1 availability in cells (Epe1<sup>deg</sup>). Epe1 transcription is regulated by a thiamine inducible nmt81 promoter and protein levels are regulated by an auxin-inducible degron tag (AID). Adding auxin and thiamine promotes the on-demand, inducible depletion of Epe1.
- (B) *epe1+* mRNA expression measured by qRT-PCR as a function of time following treatment with 15 $\mu$ M thiamine and 500 $\mu$ M NAA. Log2 fold-change of mRNA is measured relative to cells without thiamine and NAA (0 hrs). Error bars represent standard deviation, N=3.
- (C) Western blot for Epe1-3xFLAG-AID in Epe1<sup>deg</sup> strains. Media type is indicated with either a white box for no treatment, or an orange box for media with 15 $\mu$ M thiamine and 500 $\mu$ M NAA. Total protein levels are shown in the lower panel.
- (D) Examples of *S.pombe* colonies on solid media after three days of growth. Media type is indicated with either a white box for no treatment, or an orange box for media with 15 $\mu$ M thiamine and 500 $\mu$ M NAA. Image colors are inverted to highlight cell colonies.
- (E) Colony size distribution measured as pixel area in different genetic backgrounds and growth conditions. Cell size quantified after five days of growth. Media type is indicated with either a white box for no treatment, or an orange box for media with 15 $\mu$ M thiamine and 500 $\mu$ M NAA. Mean and st. dev of distributions in pixels<sup>2</sup>: *mst2+* *epe1*<sup>deg</sup> no treatment (240.4  $\pm$  64.2), thiamine and NAA (151.2  $\pm$  46.6); *mst2* $\Delta$  *epe1*<sup>deg</sup> no treatment (246.2  $\pm$  74.6), thiamine and NAA (109.4  $\pm$  64.0)
- (F) *clr4+* mRNA expression measured by qRT-PCR after five days of treatment with 15 $\mu$ M thiamine and 500 $\mu$ M NAA. Log2 fold-change expression of mRNA is relative to mRNA expression without thiamine and NAA. Error bars represent standard deviation, N=3.



152 We grew cells overnight and plated equal numbers on non-selective media (white '-'  
153 square) or media that contained NAA and thiamine (orange '+' square) and quantified the  
154 mean and standard deviation for colony sizes (**Figure 1D**). We observed generally smaller  
155 colonies and substantial colony size heterogeneity when we depleted Epe1 in an *mst2Δ*  
156 background, reflecting a fitness loss associated with stress (**Figures 1D-E**). Furthermore,  
157 *mst2Δ epe1<sup>deg</sup>* cells exhibited a 4-fold decrease in *Clr4* mRNA levels after five days of Epe1  
158 depletion, which recapitulates the adapted state we observed in *mst2Δ epe1Δ* cells (**Figure**  
159 **1F, S1C**). In contrast, depleting Epe1 in an *mst2+* background produced a less pronounced  
160 growth defect and no detectable adaptive *Clr4* silencing. Hence, despite the absence of  
161 Epe1, these cells exhibited no obvious phenotypic change. Furthermore, there was no  
162 decrease in *Clr4* mRNA for *mst2+ epe1<sup>deg</sup>* cells after five days of Epe1 depletion, consistent  
163 with previous studies.<sup>47</sup>

164 To test if adaptation was dependent on the order in which the two heterochromatin  
165 regulators were depleted, we inverted our genetic background. We developed a strain to  
166 deplete Mst2 (*mst2<sup>deg</sup>*) in an *epe1Δ* background: *mst2<sup>deg</sup> epe1Δ* (**Figure S1D-G**). While there  
167 was still some decrease in colony size upon Mst2 depletion, this strain did not produce the  
168 same degree of heterogeneity in colony size (**Figure S1E-F**). Additionally, we observed that  
169 *Clr4* was silenced to a lesser degree compared to *mst2Δ epe1<sup>deg</sup>* cells (**Figure S1G**). Finally,  
170 we also developed strains where both Mst2 and Epe1 could be simultaneously depleted in  
171 an inducible manner (*mst2<sup>deg</sup> epe1<sup>deg</sup>*) which would enable us to test if pre-deleting Epe1 or  
172 Mst2 produces differences in adaptive phenotypes (**Figure S1H**). The *mst2<sup>deg</sup> epe1<sup>deg</sup>*  
173 exhibited comparable levels of colony size variegation and more robust *clr4+* mRNA  
174 suppression compared to *mst2Δ epe1<sup>deg</sup>* (compare **Figure 1C-E** to **Figure S1I-K**).  
175 Nevertheless, even in these strains we noted a residual level of Mst2 protein that remained  
176 refractory to depletion after NAA and thiamine addition which we reasoned could potentially  
177 have unintended consequences on our adaptation measurements. Collectively, our results  
178 establish a system for the inducible, rapid, and complete depletion of Epe1, and demonstrate

179 that the *epe1<sup>deg</sup>* allele recapitulates how *S.pombe* cells adapt in response to acute  
180 heterochromatin misregulation.

### 181 **Time evolution of adaptive silencing during heterochromatin misregulation**

182 To trace the time evolution of adaptation following Epe1 depletion, we deployed the  
183 automated eVOLVER continuous culture platform (**Figure 2A**).<sup>51,52</sup> eVOLVER enables long-  
184 term maintenance of independent *S.pombe* cultures in miniature bioreactors using a  
185 continuous turbidostat routine with real-time growth rate quantification.<sup>53–55</sup> The eVOLVER  
186 system also features the ability to schedule media changes, including switching between  
187 non-inducer and inducer media. As a result, we can precisely quantify changes in growth  
188 resulting from Epe1 depletion, and sample cells as a function of time for molecular  
189 measurements to reconstruct the dynamics of Clr4 silencing and concomitant changes in  
190 transcription.

191 We grew replicate populations of *mst2Δ epe1<sup>deg</sup>* cells in eVOLVER turbidostats for 48  
192 hours at 32°C before switching to inducer (NAA and thiamine-containing) media to trigger  
193 Epe1 depletion (Methods). Upon induction, we observed a substantial reduction in growth  
194 rate over the course of a 48-hour period (**Figure 2B**). This was followed by a recovery period  
195 in which cells returned to pre-depletion growth rates, indicative of adaptation to  
196 heterochromatin misregulation. Based on the eVOLVER time traces, we posited that cells  
197 transit through three primary phases upon experiencing heterochromatin misregulation,  
198 namely 1) **untreated** (before inducing Epe1 depletion) 2) **stress** (post-induction,  
199 characterized by poor growth) and, 3) **adapted** (growth recovery). Replicate eVOLVER  
200 populations of *mst2<sup>deg</sup> epe1<sup>deg</sup>* closely followed the same growth trends as that of the *mst2Δ*  
201 *epe1<sup>deg</sup>* strains (**Figure S2A**). In contrast, we observed little change in the growth rate in  
202 *mst2Δ epe1<sup>deg</sup> clr4Δ* populations upon induction of Epe1 depletion suggesting that the  
203 growth rate changes in *mst2Δ epe1<sup>deg</sup>* strains was dependent on H3K9 methylation (**Figure**  
204 **S2B**).

**Figure 2: Time evolution of adaptive silencing during heterochromatin misregulation**

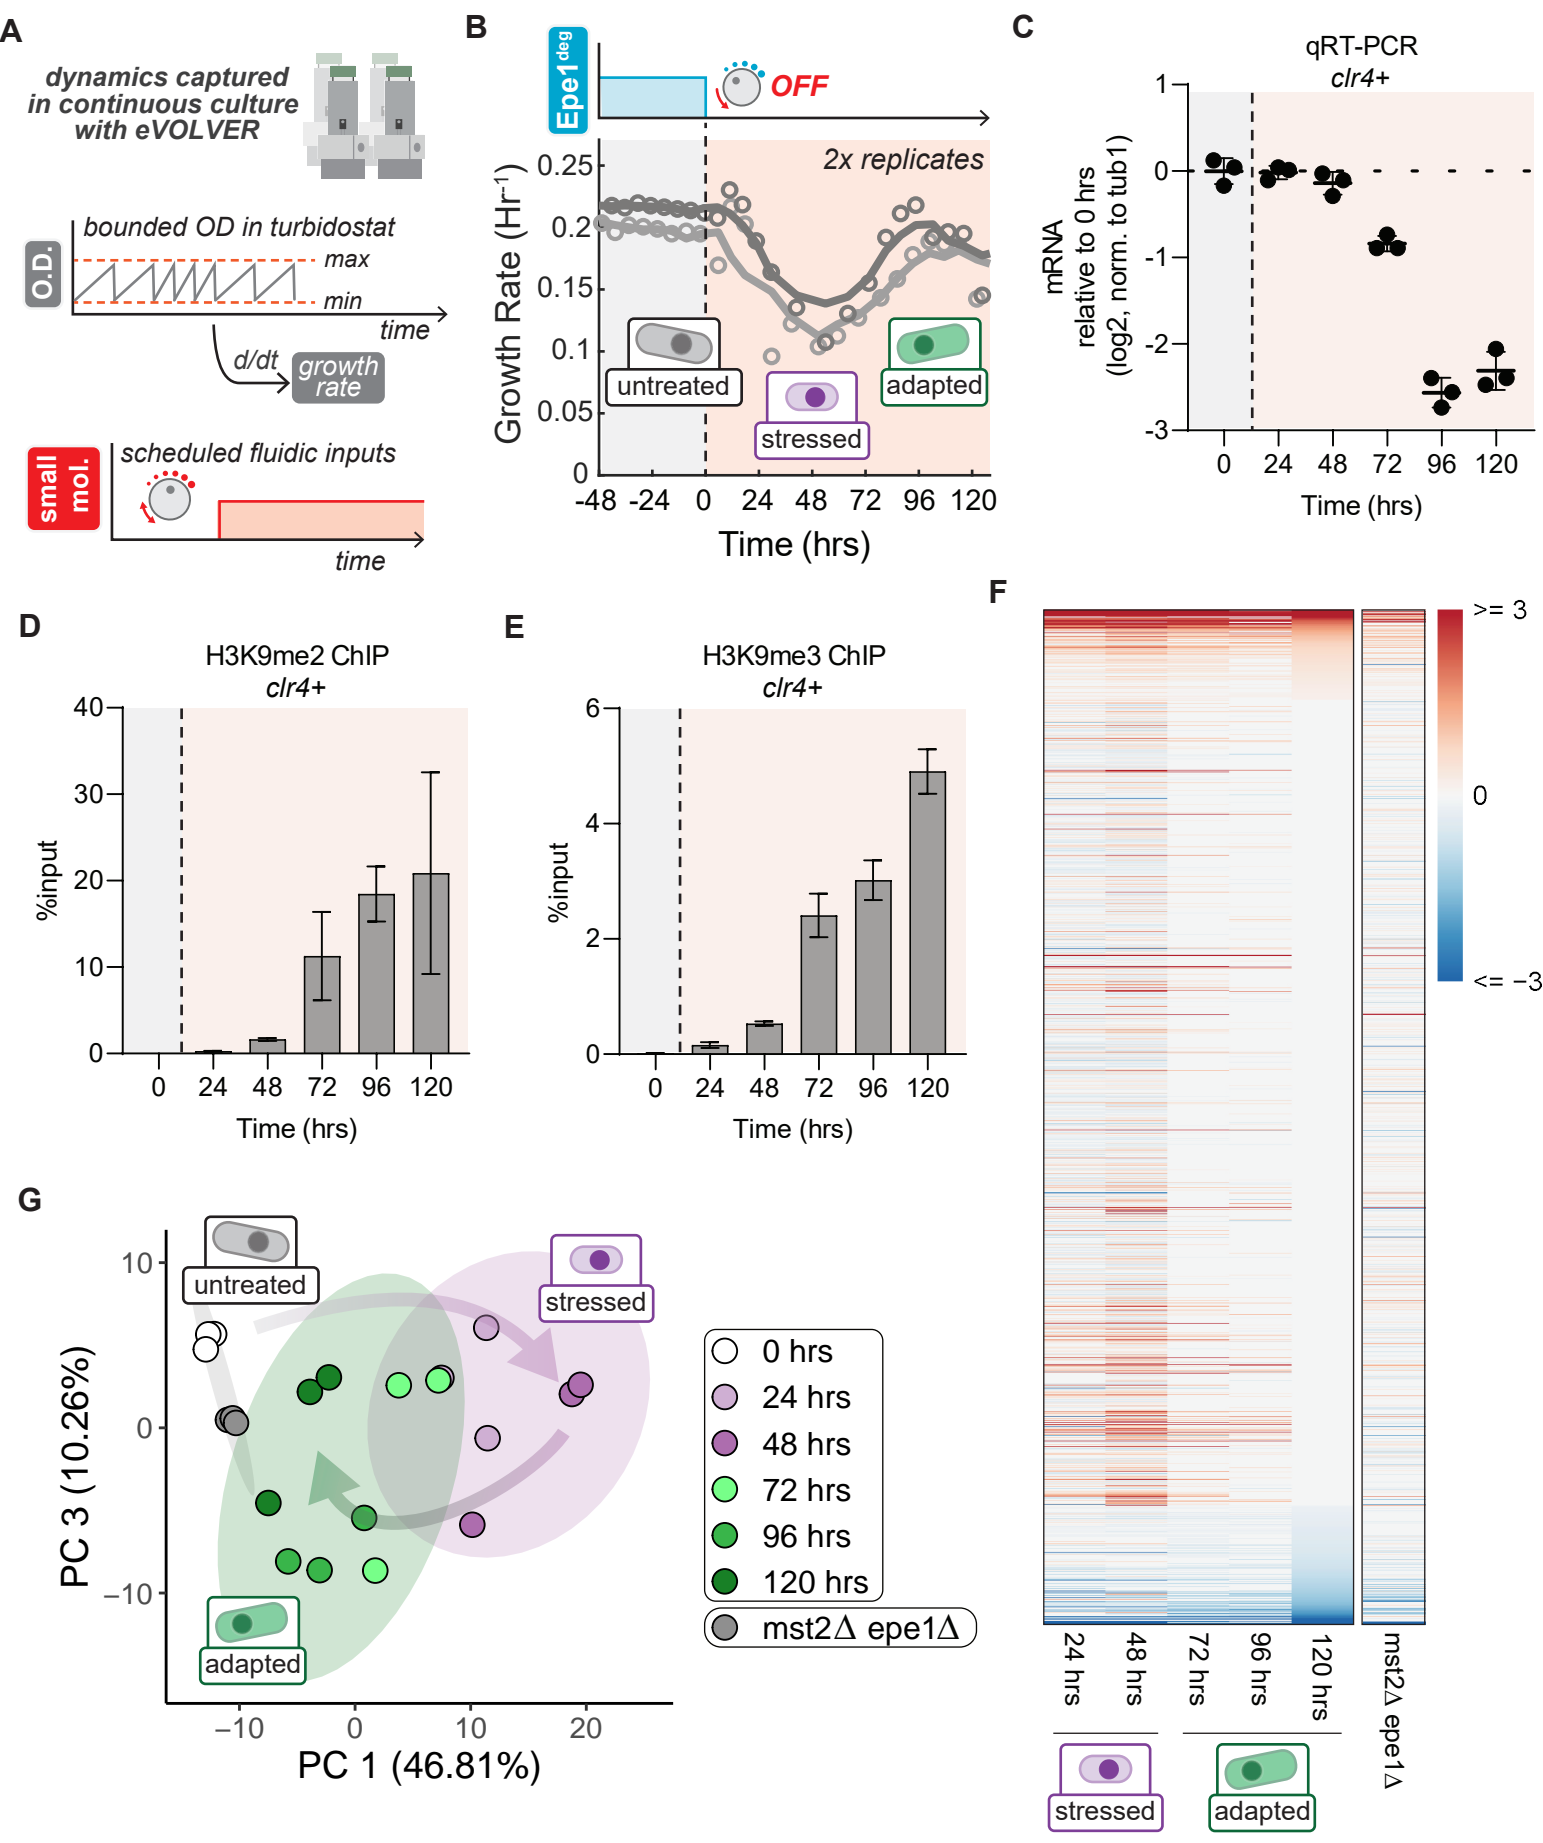

## Figure 2. Time evolution of adaptive silencing during heterochromatin misregulation.

- (A) Model of the eVOLVER continuous culture system used to control growth of *mst2Δ epe1<sup>deg</sup>* cells using a continuous turbidostat routine, with real-time quantification of growth rate and the ability to schedule media changes.
- (B) Real-time monitoring of growth rates of *mst2Δ epe1<sup>deg</sup>* in eVOLVER. Treatment with 15μM thiamine and 500μM NAA was initiated at t=0hrs. Individual trendlines indicate replicates (N=2). Orange shaded portion represents the time period during which Epe1 has been depleted.
- (C) *clr4+* mRNA expression measured by qRT-PCR as a function of time following treatment with 15μM thiamine and 500μM NAA. Log<sub>2</sub> fold-change of mRNA is measured relative to cells without thiamine and NAA (0 hrs). Orange shaded portion represents the time period during which Epe1 has been depleted. Error bars represent standard deviation, N=3.
- (D) H3K9me2 ChIP-qPCR measured at the *clr4+* locus as a function of time following treatment with 15μM thiamine and 500μM NAA. The orange shaded portion represents the time period during which Epe1 has been depleted. Error bars represent standard deviation, N=2.
- (E) H3K9me3 ChIP-qPCR measured at the *clr4+* locus as a function of time following treatment with 15μM thiamine and 500μM NAA. Orange shaded portion represents the time period during which Epe1 has been depleted. Error bars represent standard deviation, N=2.
- (F) Heatmap of significant differentially expressed genes following treatment with thiamine and auxin relative to untreated *mst2Δ epe1<sup>deg</sup>* cells. Heatmap consists of genes that are differentially expressed at least during one time point. Total number of differentially expressed transcripts N=3896, significance cutoff of AdjPval ≤ 0.01.
- (G) Time course PCA analysis of the regularized log transform of RNAseq normalized counts denoting different time points after treatment with 15μM thiamine and 500μM NAA. Colors denote untreated, stress and adapted cell phases. N=3, ellipse level=0.9.

205 To reconstruct time-resolved changes in Clr4 silencing, we harvested *mst2Δ epe1<sup>deg</sup>*  
206 cells grown in 24-hour time intervals for quantification of *clr4+* mRNA and H3K9me2/me3  
207 levels. In the initial stress phase (during the first 48 hours post-induction), we observed no  
208 changes in *clr4+* mRNA and very minimal increases to H3K9me2/me3 levels (**Figures 2C-**  
209 **E**). However, during the adapted phase (after 48 hours) we observed a substantial decrease  
210 in *clr4+* mRNA expression (**Figure 2C**). The change in *clr4+* mRNA levels coincided with  
211 enrichment of H3K9me2/3 at the *clr4+* locus, which had remained largely unmarked until that  
212 time (**Figure 2C-E, S2C-D**). Thus, the transition between the stress and adapted phases is  
213 closely aligned with a steady enrichment of H3K9me2/me3 and reduction in *clr4+* mRNA  
214 levels. These results demonstrate that growth rate and Clr4 silencing dynamics are closely  
215 coordinated as cells adapt to acute heterochromatin misregulation stress.

216 To assess transcriptome-wide changes during the time-course of adaptation, we  
217 performed RNA-seq on *mst2Δ epe1<sup>deg</sup>* samples that were collected at 24-hour intervals in  
218 triplicate. In the stress phase, we observed acute changes to the transcriptome relative to  
219 untreated *mst2Δ epe1<sup>deg</sup>* cells (**Figure 2F**). These gene expression changes during the  
220 stress phase gradually vanished by the end of the time course such that, by the time  
221 adaptation was completed, the transcriptome of Epe1-depleted cells resembled those of  
222 untreated cells. We applied principal component analysis (PCA) to further investigate the  
223 transcriptome changes. PCA clearly captured time-dependent transitions between different  
224 growth phases following Epe1 depletion (**Figure 2G, S2E**). Notably, gene expression  
225 changes in the stress phase (24-48 hours) and those in the late adapted phase (96-120  
226 hours) cluster into non-overlapping statistically significant groups, with the 72-hour time point  
227 falling at the intersection between these two groups.

228 We additionally performed RNA-seq analysis on *mst2Δ epe1Δ* cells to compare with  
229 *mst2Δ epe1<sup>deg</sup>* cells. Most strikingly, the transcriptomes of these cells most closely  
230 resembled untreated *mst2Δ epe1<sup>deg</sup>* cells (0 hours) (**Figure 2G, S2E**). Importantly, we  
231 confirmed that independent *mst2Δ epe1Δ* clones have few differences in their

232 transcriptomes, implying that independent isolates also make the same adaptive choices  
233 and their gene expression networks are rewired in a very similar manner (**Figure S2F-G**).  
234 *mst2Δ epe1Δ* cells have silenced *clr4+* and have been grown well beyond 120 hours. Thus,  
235 their convergence towards the untreated transcriptome implies that there are additional RNA  
236 level changes that occur beyond our 120-hour adaptation time-course. For example, we  
237 found that, in Epe1-depleted cells at 120 hours, genes associated with iron homeostasis are  
238 upregulated while genes associated with ATP synthesis and cellular respiration are  
239 downregulated (**Figure S2H-I**), whereas in *mst2Δ epe1Δ* cells these genes returned to  
240 expression levels equivalent to untreated *mst2Δ epe1<sup>deg</sup>* cells (**Figure S2J**).<sup>39</sup> Taken  
241 together, our system reveals distinct population-level cell states during the adaptation  
242 process.

### 243 **Heterochromatin misregulation triggers the targeted expansion of pre-existing** 244 **H3K9me3 islands**

245 To investigate how heterochromatin misregulation drives changes in the H3K9  
246 methylome over time, we cultured *mst2Δ epe1<sup>deg</sup>* cells as batch cultures over six 24-hour  
247 periods encompassing the untreated, stress, and adapted phases. We then performed  
248 chromatin immunoprecipitation followed by deep sequencing (ChIP-seq) to map changes in  
249 the H3K9 methylome. We observed expansion of specific H3K9me3 domains, primarily at  
250 constitutive heterochromatin (pericentromeres, telomeres, and the ribosomal DNA locus) and  
251 several heterochromatin islands centered around meiotic genes and ncRNAs (**Figure 3A,**  
252 **Figure S3A, Table S4**).<sup>46,47,56</sup> We used K-means clustering to separate H3K9me3 peaks into  
253 four statistically defined groups. The first group uniquely corresponds to the *clr4+* locus where  
254 H3K9me3 is established and maintained throughout the time course of adaptation. The other  
255 three groups contain almost all the identified islands, which show a pattern of growth up to 48  
256 hours, then decay by 120 hours while *clr4+* (depicted in group 1) undergoes silencing. We  
257 observed very little enrichment for H3K9me2 or H3K9me3 peaks outside of these islands or  
258 constitutive heterochromatin. Expansion of H3K9me3 reached a maximum at the end of stress

Figure 3: Heterochromatin misregulation triggers the targeted expansion of pre-existing H3K9me3 islands and leads to the silencing of a small fraction of essential genes.

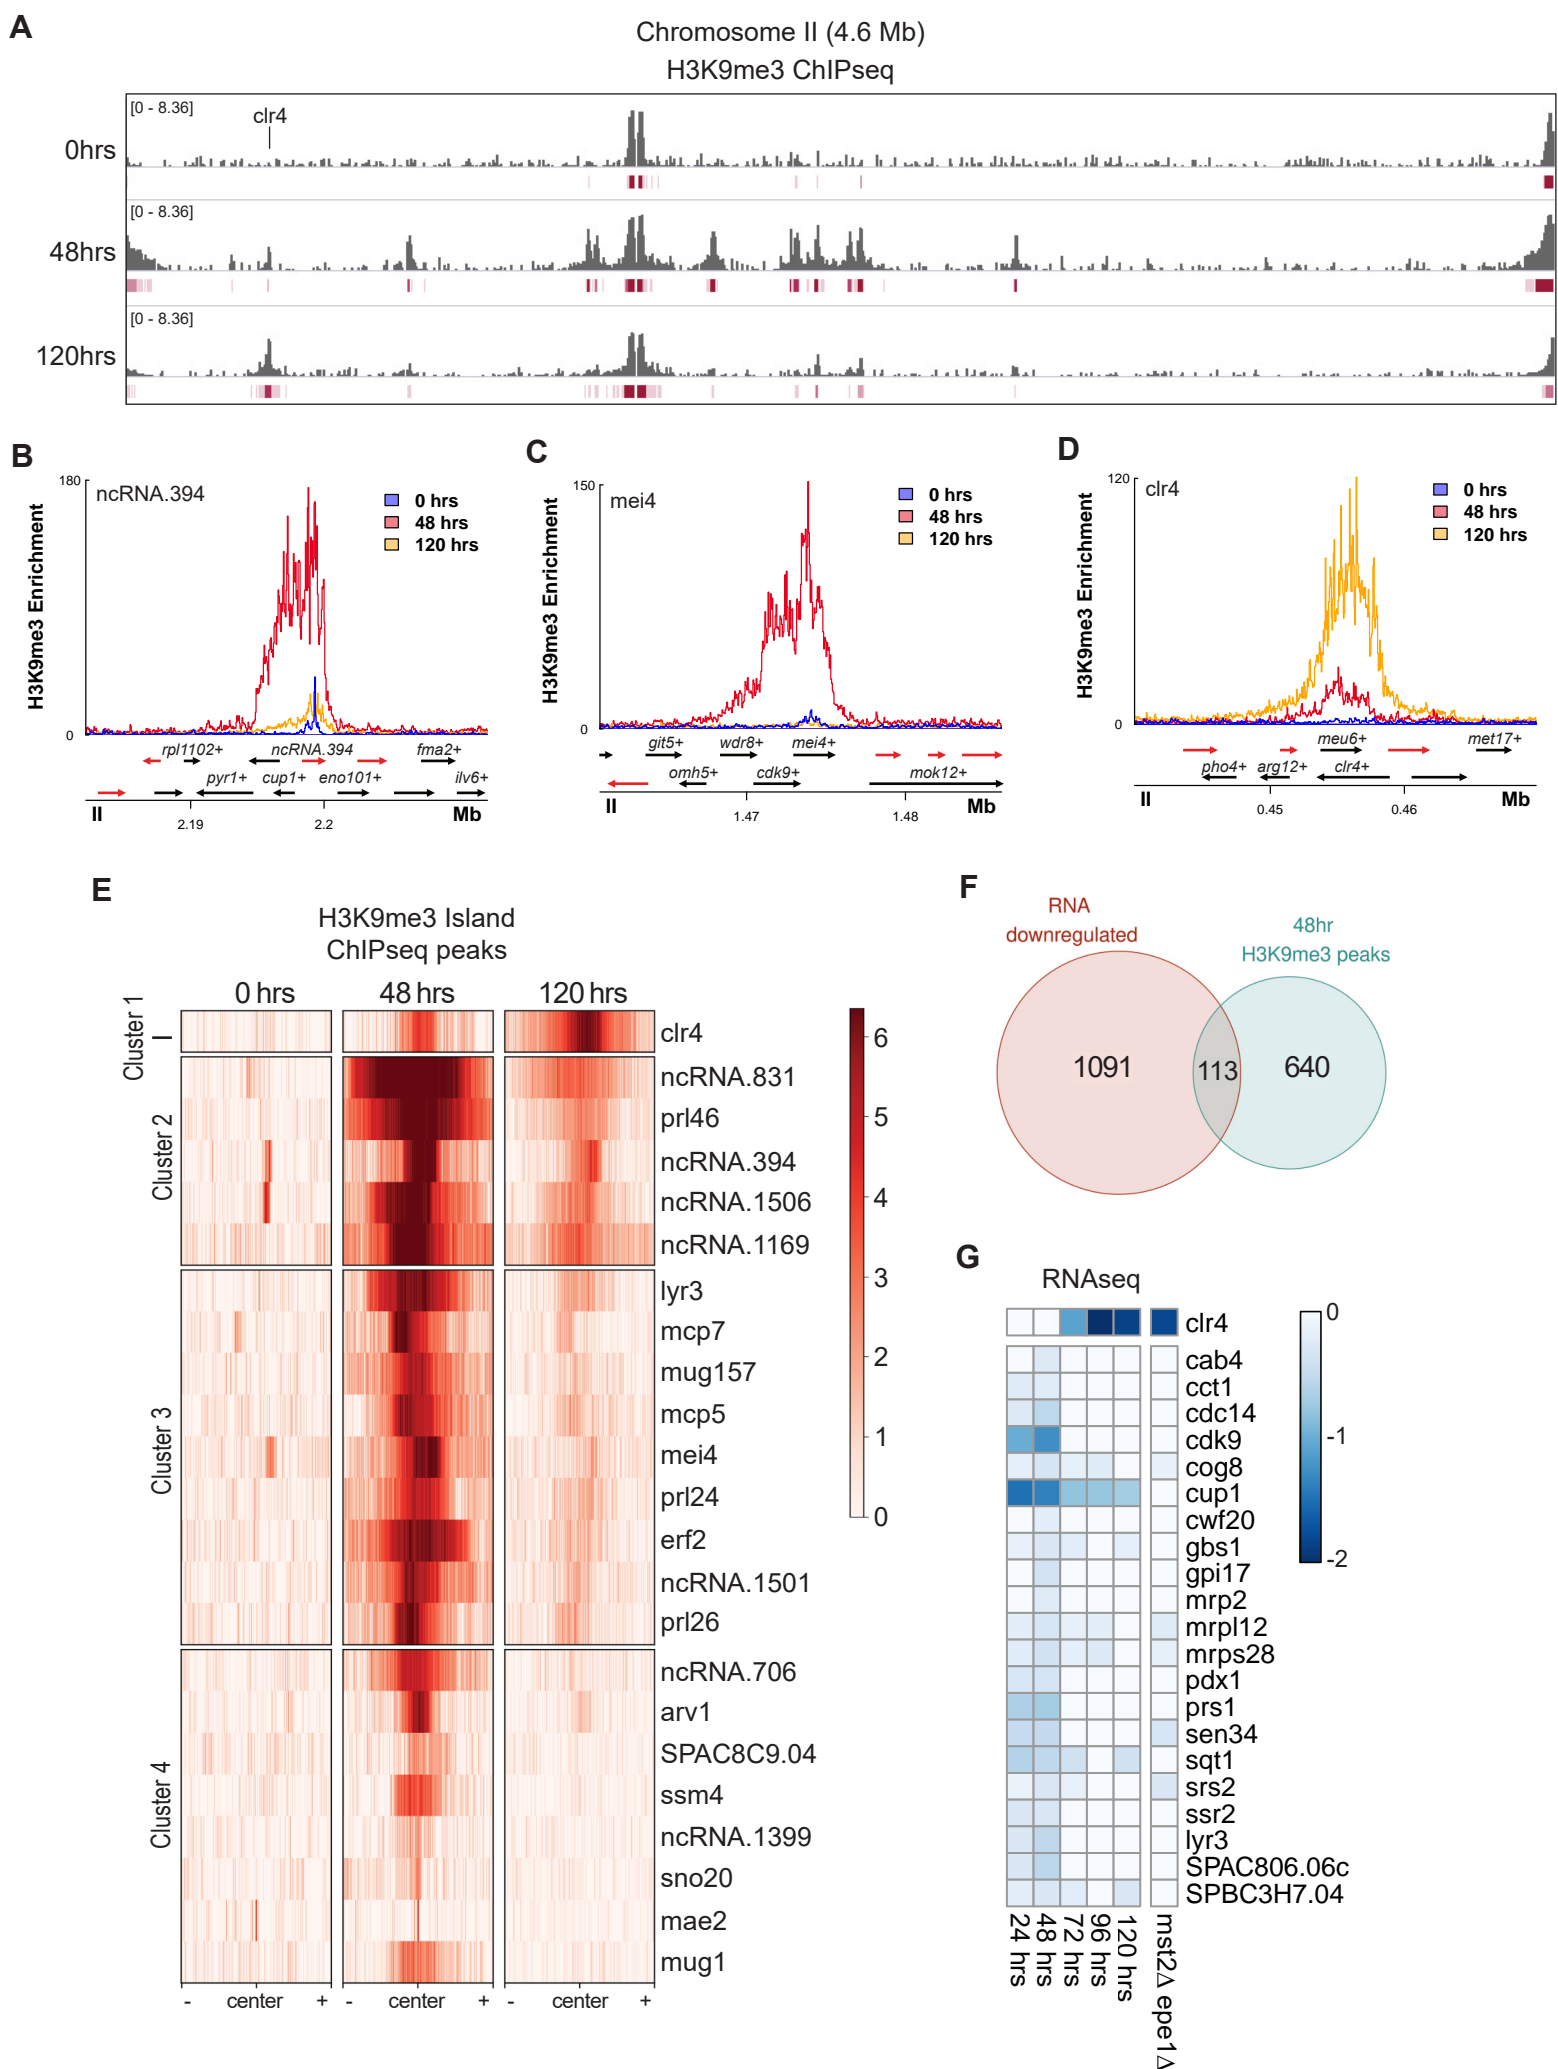



### Figure 3. Heterochromatin misregulation triggers the targeted expansion of pre-existing H3K9me3 islands

- (A) H3K9me3 ChIP-seq tracks of chromosome II of the *S. pombe* genome. Enrichment is shown in log<sub>2</sub> fold change of IP normalized to input. Time of Epe1 depletion is indicated on the left side of each track. Peaks identified are denoted in red below each track. The *clr4+* gene locus is specifically highlighted. One of two ChIP-seq replicates is shown in this figure.
- (B) H3K9me3 ChIP-seq enrichment centered on *ncRNA.394* for the indicated time points. Genomic tracks below show coding transcripts in black, non-coding transcripts in red.
- (C) H3K9me3 ChIP-seq enrichment centered on *mei4+* for the indicated time points. Genomic tracks below show coding transcripts in black, non-coding transcripts in red.
- (D) H3K9me3 ChIP-seq enrichment centered on *clr4+* for the indicated time points. Genomic tracks below show coding transcripts in black, non-coding transcripts in red.
- (E) K-means clustered heatmap (k=4) of H3K9me3 islands during heterochromatin misregulation at 0hrs, 48hrs, and 120hrs of Epe1 depletion in *mst2Δ epe1<sup>deg</sup>*. Peaks shown in 24kb windows.
- (F) Venn diagram depicting genes that are downregulated (AdjPval ≤ 0.01) by 48 hours after Epe1 depletion, overlapped with genes marked by H3K9me3 selectively at 48 hours.
- (G) Heatmap depicting the expression dynamics of essential genes selectively marked by H3K9me3 at 48 hours. Changes in expression are log<sub>2</sub> fold change relative to untreated *mst2Δ epe1<sup>deg</sup>* cells. (AdjPval ≤ 0.01)



259 phase (48 hours) followed by a steady decay in the adapted phase at constitutive  
260 heterochromatin, non-coding RNAs, and meiotic genes (**Figure 3B-C**). In contrast, H3K9me3  
261 is deposited *de novo* at the *clr4+* locus and accumulates over time (**Figure 3D**). This process  
262 is distinct from other H3K9me3 peaks at meiotic genes or ncRNA, which expand during stress  
263 and then subsequently retract once cells adapt (**Figure 3E, S3B**). We also validated that the  
264 pre-deletion of Mst2 did not drive any pre-adaptation by performing ChIP-seq measurements  
265 of H3K9me3 in *mst2<sup>deg</sup> epe1<sup>deg</sup>* cells, wherein the islands that form during and after adaptation  
266 are identical to *mst2 $\Delta$  epe1<sup>deg</sup>* cells (**Figure S3C-D**).

267 We cross-referenced our H3K9me3 ChIP-seq and transcriptome time-course data to  
268 measure transcriptomic changes caused by aberrant H3K9me spreading during  
269 heterochromatin misregulation. We found a total of 753 genes under expanded H3K9me3  
270 peaks during stress phase (48 hours) that were previously not marked by H3K9me3 in the  
271 untreated population (**Figure S3E**). Surprisingly, of these 753 genes, a subset of only 113  
272 genes were significantly downregulated (**Figure 3F**). This subset of genes was not  
273 functionally enriched for any specific pathways by GO analysis, but notably included a  
274 collection of 21 essential genes, including the mitochondrial LYR protein *cup1+*.<sup>21,57</sup> These  
275 essential genes are repressed up until the end of stress phase (48 hours) after which *clr4+*  
276 silencing and growth rate recovery coincides with their de-repression (**Figure 3G**). This  
277 observation suggests that the downregulation of *cup1+*, and other essential genes proximal  
278 to expanding H3K9me3 islands, may correlate with poor cell growth during early  
279 heterochromatin misregulation. In contrast, during the adapted phase, there was a dramatic  
280 shift in the H3K9me3 methylome. Genes that were marked by novel H3K9me3 and  
281 significantly downregulated were proximal to the *clr4+* locus (**Figure S3F-H**). Together,  
282 these results indicate that heterochromatin misregulation drives very targeted expansion of  
283 existing H3K9 methylation domains, silencing only a small fraction of essential genes.  
284 Additionally, development of facultative heterochromatin over the *clr4+* locus occurs *de novo*

285 and represents a rare example of a new ectopic site of H3K9 methylation distinct from the  
286 targeted expansions of existing sites of H3K9 methylation.

287 **Activation of the cellular stress response pathway is required for survival but not**  
288 **adaptive choice**

289 To identify gene pathways relevant to the stress phase of heterochromatin  
290 misregulation, we analyzed the set of differentially expressed genes within the stress phase  
291 of *mst2Δ epe1<sup>deg</sup>* cells, envisioning that it is most likely to contain the most critical population-  
292 level transcriptomic features required for adaptation. Enriched GO terms in this set included  
293 genes involved in ribosome biogenesis, translation, caffeine and rapamycin treatment,  
294 nitrogen depletion, and the core environmental stress response (CESR) (**Figure 4A, S4A**)  
295 <sup>58,59</sup>. These results were surprising, given our prior assumption that misregulation of the  
296 epigenome is a unique form of stress distinct from other types of environmental stresses.  
297 Mapping time-dependent changes across these GO categories reveals that the differential  
298 expression of cell proliferation and stress response genes subsides as adaptive Clr4  
299 silencing is established (**Figure 4B, S4B-F**). Considering this apparent relationship, we  
300 wanted to interrogate the role that the stress response pathway plays in cell survival during  
301 heterochromatin misregulation and adaptive Clr4 silencing.

302 The CESR pathway plays a major role in *S.pombe* stress response. To interrogate  
303 the functional role of CESR during induced heterochromatin misregulation, we deleted the  
304 MAP kinase Sty1 in an *mst2Δ epe1<sup>deg</sup>* background. Sty1 regulates stress response in  
305 *S.pombe* by phosphorylating transcription factors that activate the expression of stress  
306 response genes, including a majority of genes in CESR (**Figure 4C**) <sup>58</sup>. In our original *mst2Δ*  
307 *epe1<sup>deg</sup>* plate assay, when equal numbers of cells were plated, colony numbers were  
308 approximately equivalent regardless of Epe1 expression, suggesting a high heterochromatin  
309 misregulation stress survival rate (**Figure 4D**). To test how stress response plays into this  
310 survival, we plated *mst2Δ epe1<sup>deg</sup> sty1Δ* cells on solid media for five days and measured cell  
311 colony size and survival frequency. *mst2Δ epe1<sup>deg</sup> sty1Δ* colonies were on average smaller

Figure 4: Activation of the cellular stress response pathway is required for survival but not adaptive response (which was not certified by peer review) is the author/funder. All rights reserved. No reuse allowed without permission.

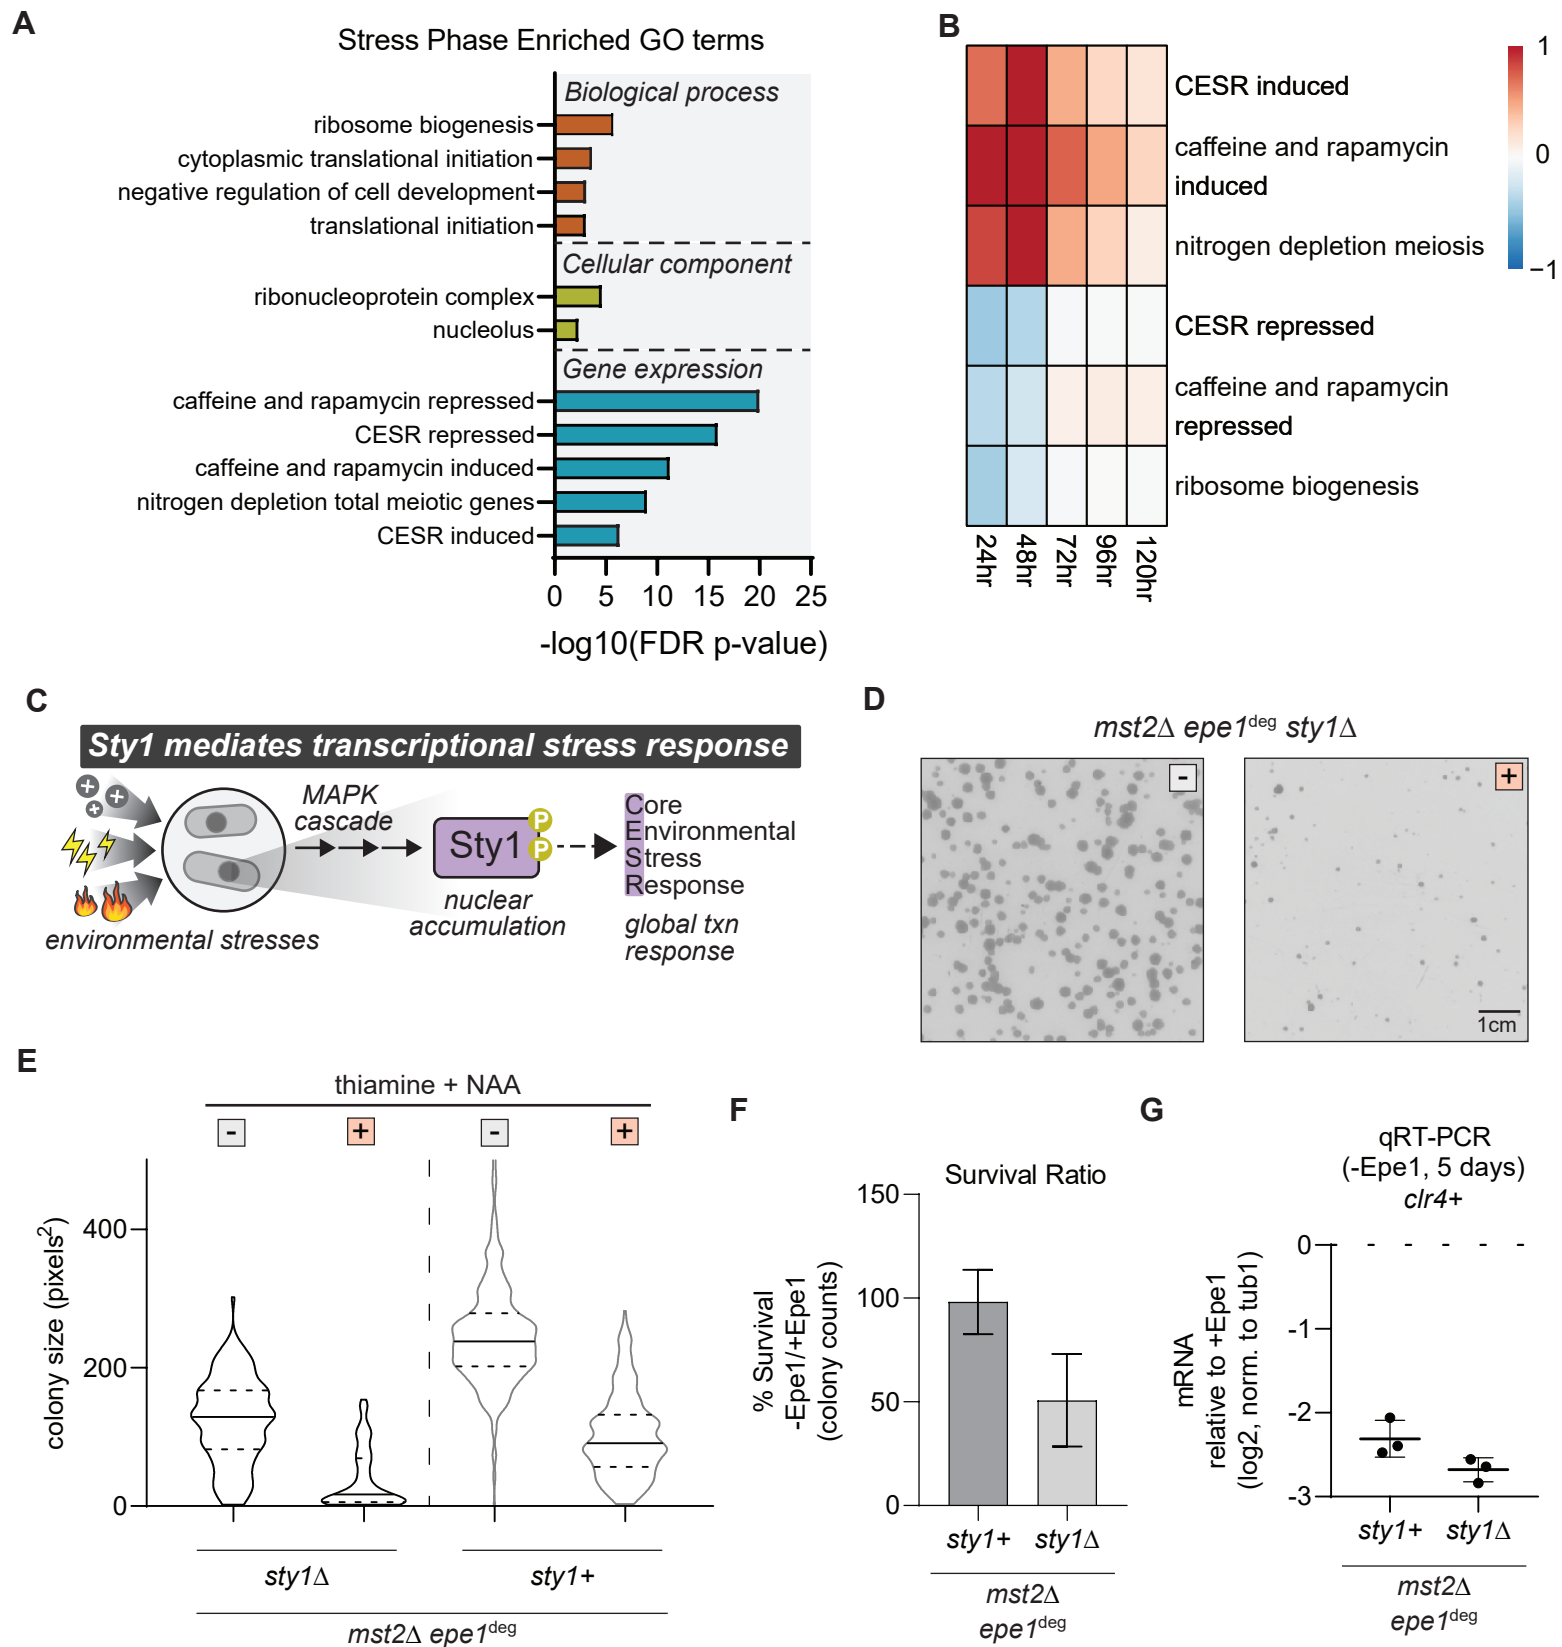

## Figure 4 Activation of the cellular stress response pathway is required for survival but not adaptive choice

- (A) Selected GO terms for genes differentially expressed ( $\text{AdjPval} \leq 0.01$ ) within stress phase (48 hours of Epe1 depletion). GO significance cutoff was set as  $\text{FDR p-value} \leq 0.01$ .
- (B) Heatmap showing average fold change for genes differentially expressed ( $\text{AdjPval} \leq 0.01$ ) in selected GO categories, relative to untreated *mst2Δ epe1<sup>deg</sup>* cells.
- (C) Environmental stresses trigger a stress-activated MAPK cascade that phosphorylates Sty1, which drives a global transcriptional response that includes the core environmental stress response.
- (D) Examples of *mst2Δ epe1<sup>deg</sup> sty1Δ S.pombe* colonies on solid media after three days of growth. Media type is indicated with either a white box for no treatment, or an orange box for media with 15μM thiamine and 500μM NAA. Image colors are inverted to highlight cell colonies.
- (E) Colony size distribution, in pixel area, under different growth conditions. Cell size quantified after five days of growth. Genotype and media treatment is indicated on the x-axis. Media type is indicated with either a white box for no treatment, or an orange box for media with 15μM thiamine and 500μM NAA. Mean and st. dev of distributions in pixels<sup>2</sup>: *mst2Δ epe1<sup>deg</sup> sty1Δ* no treatment ( $123.0 \pm 61.9$ ), thiamine and NAA ( $39.1 \pm 43.2$ ); *mst2Δ epe1<sup>deg</sup>* no treatment ( $246.2 \pm 74.6$ ), thiamine and NAA ( $109.4 \pm 64.0$ )
- (F) Percentage of *mst2Δ epe1<sup>deg</sup> sty1+* and *mst2Δ epe1<sup>deg</sup> sty1Δ* cells that survive following treatment with 15μM thiamine and 500μM NAA. Total colony count ratios were calculated by total number of colonies with thiamine and NAA divided by total number of colonies grown without thiamine and NAA.
- (G) *clr4+* mRNA expression measured by qRT-PCR in *mst2Δ epe1<sup>deg</sup> sty1+* and *mst2Δ epe1<sup>deg</sup> sty1Δ* after five days of treatment with 15μM thiamine and 500μM NAA. Log<sub>2</sub> fold-change expression of mRNA is relative to expression without thiamine and NAA.

312 than *mst2Δ epe1<sup>deg</sup>* cells, both pre- and post-Epe1 depletion (**Figure 4E**). We observed only  
313 half as many colonies formed upon plating *mst2Δ epe1<sup>deg</sup> sty1Δ* cells on NAA and thiamine-  
314 containing medium compared to *mst2Δ epe1<sup>deg</sup>* cells (**Figure 4F**). However, despite lower  
315 rates of stress-survival, Epe1-depleted *mst2Δ epe1<sup>deg</sup> sty1Δ* colonies showed equally strong  
316 adaptive silencing of *Clr4* transcription compared to *mst2Δ epe1<sup>deg</sup>* (**Figure 4G**). This  
317 suggests that the activation of stress response pathways is an on-pathway intermediate prior  
318 to adaptation, instead of directly driving redistribution of H3K9 methylation.<sup>60</sup> Altogether,  
319 these results support Sty1 activity as beneficial for survival during heterochromatin  
320 misregulation.

### 321 **Loss of the RNA binding protein Red1 attenuates stress and delays adaptive *clr4+*** 322 **silencing**

323 We hypothesized that cells must leverage existing heterochromatin nucleation  
324 pathways to establish adaptive heterochromatin at new locations in the genome. This in turn  
325 could affect the duration and outcome of the stress phase and the subsequent adaptive  
326 phase. Based on our H3K9me3 ChIP-seq analysis of heterochromatin islands at meiotic  
327 genes and ncRNA, we focused on two major heterochromatin nucleation pathways – RNAi  
328 (*Ago1*, *Dcr1*) and MTREC (*Red1*).<sup>46,56,61,62</sup> Surprisingly, we observed a lesser degree of *clr4+*  
329 transcriptional silencing in the adapted phase only in *red1Δ* cells but not *ago1Δ* or *dcr1Δ*  
330 cells (**Figure 5A, S5A**).<sup>47</sup> To determine if the changes we measured in *clr4+* silencing  
331 correlate with any change in stress cells experience, we conducted growth experiments  
332 using replicate *mst2Δ epe1<sup>deg</sup> red1Δ* cultures on plates supplemented with NAA and  
333 thiamine, as well as in continuous culture using the eVOLVER system (**Figure 5B, S5B-C**).  
334 These approaches confirmed a fitness increase during the stress phase compared to *red1+*  
335 cells. In contrast, *ago1Δ* and *dcr1Δ* cells exhibited the expected loss of fitness further  
336 confirming a distinctive role for Red1 during the stress and adaptive phase. To further  
337 quantify and compare loss of fitness during the stress phase, we calculated the mean  
338 minimum decrease in growth rates for each eVOLVER experiment (**Methods**). Red1-

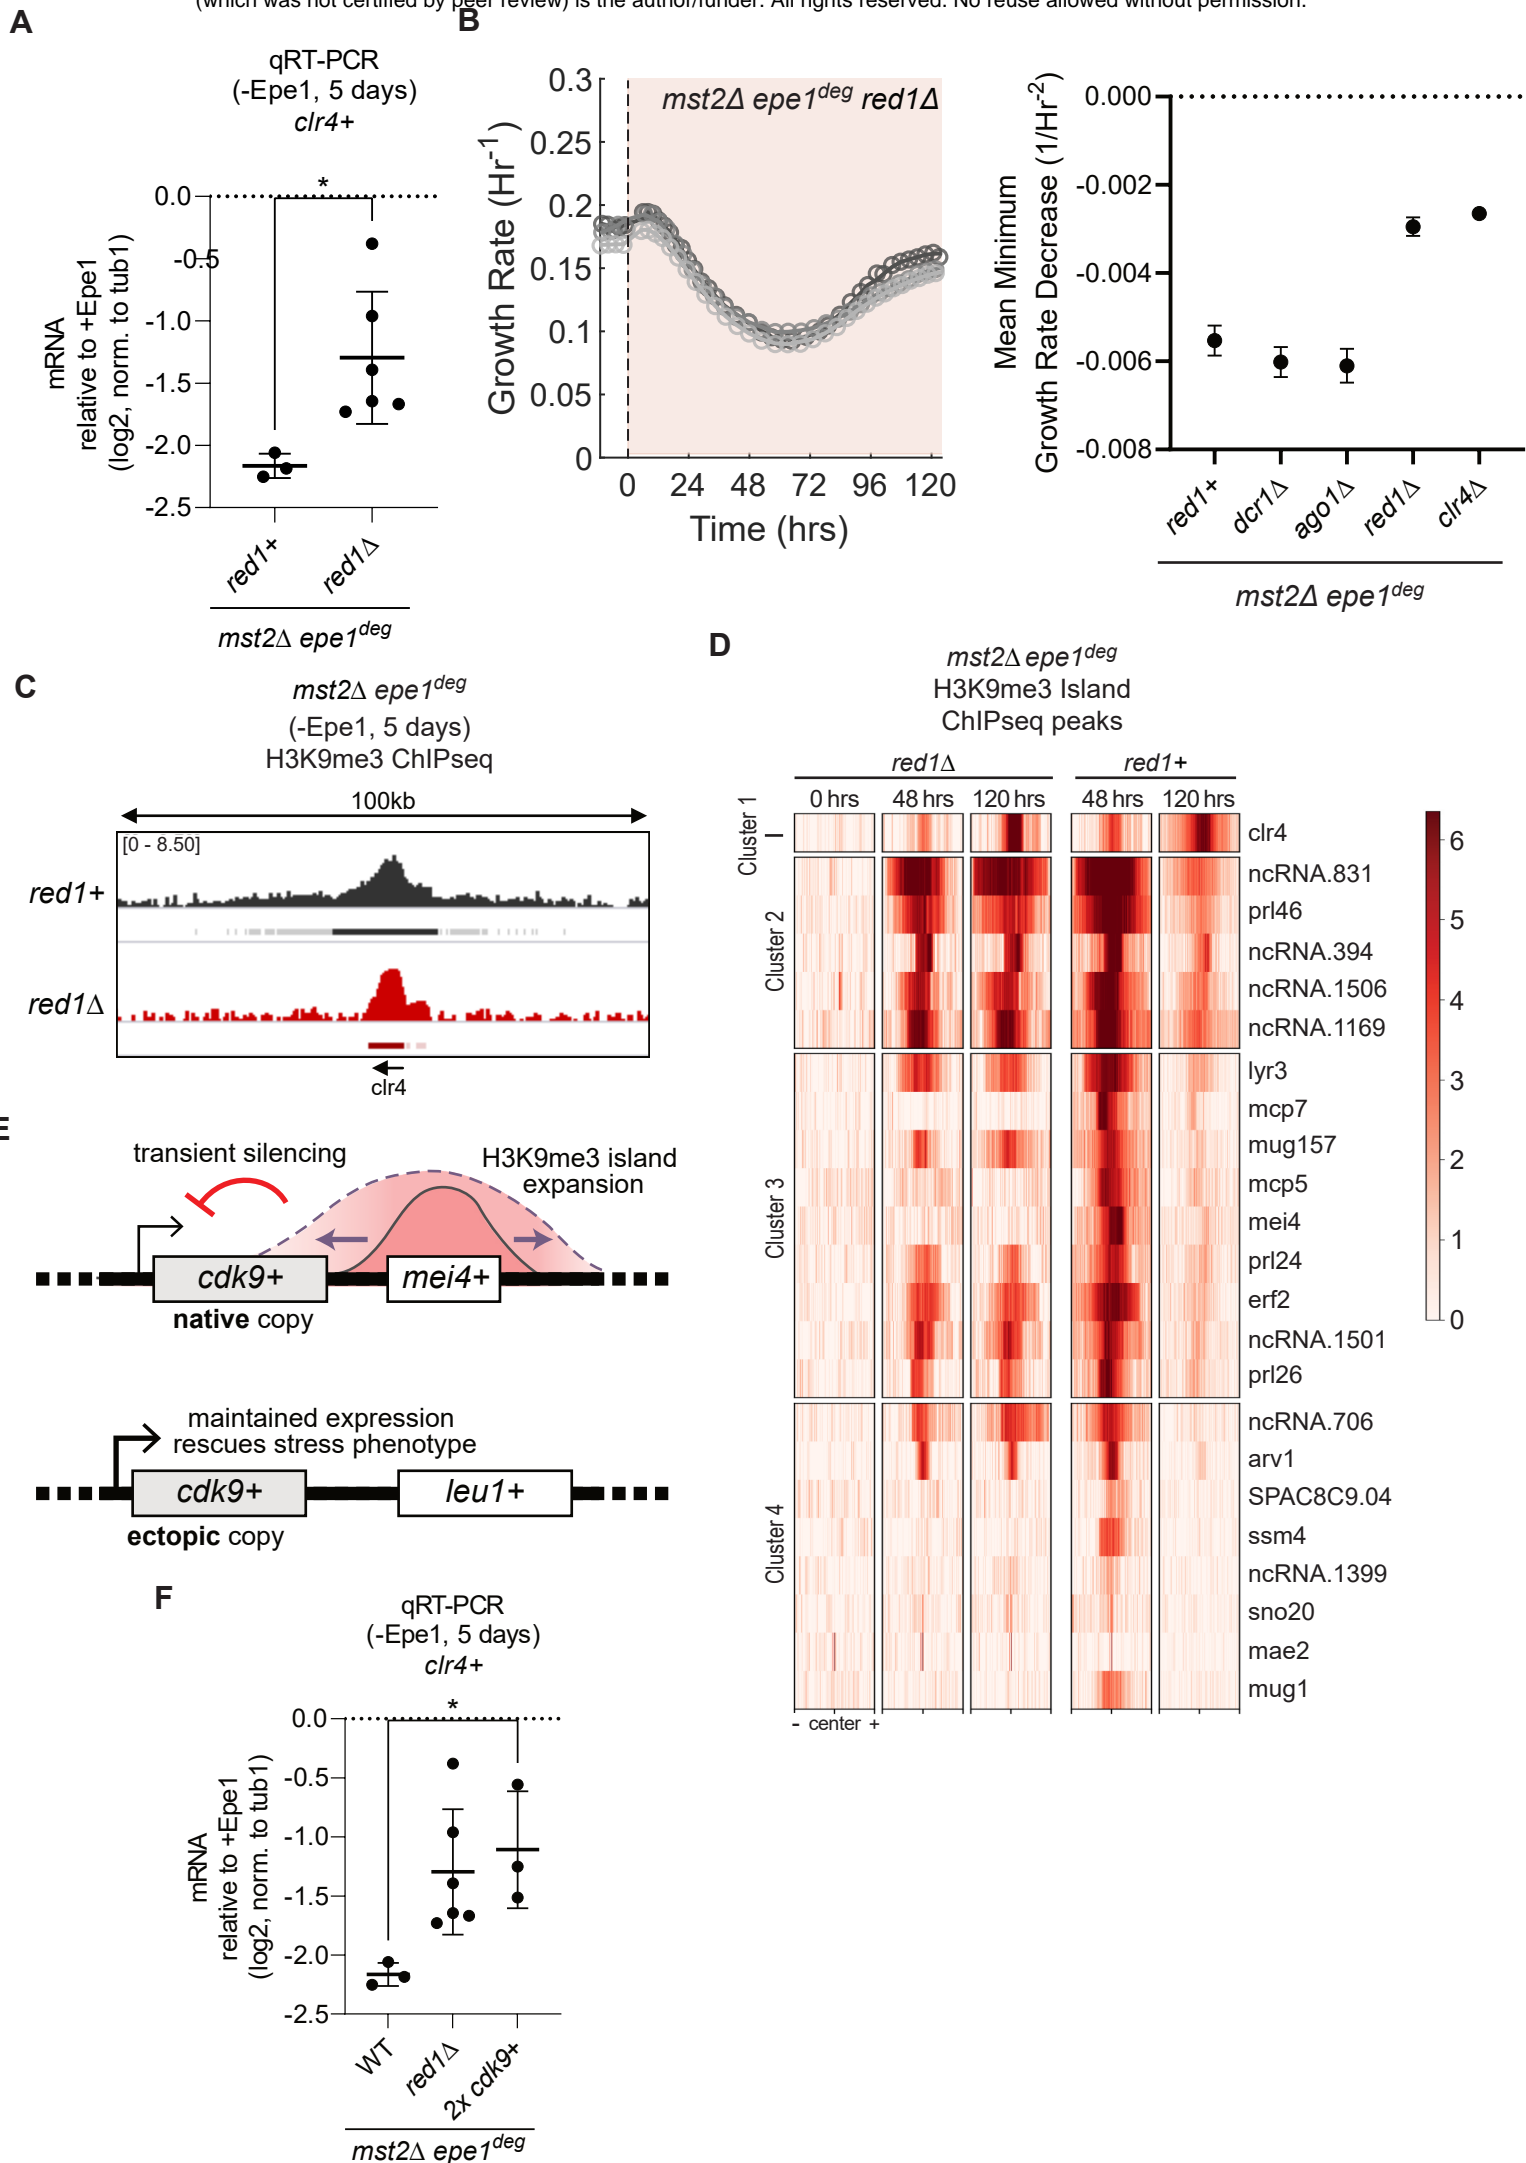

**Figure 5: Loss of the RNA binding protein Red1 attenuates stress and delays adaptive *clr4+* silencing**

- (A) *clr4+* mRNA expression measured by qRT-PCR after five days of treatment with 15 $\mu$ M thiamine and 500 $\mu$ M NAA. Log<sub>2</sub> fold-change expression of mRNA is relative to mRNA expression without thiamine and NAA. Error bars represent standard deviation, N=3 or 6. Asterisk indicates  $p < 0.05$ .
- (B) (Left) Real-time monitoring of population growth rates of *mst2 $\Delta$  epe1<sup>deg</sup> red1 $\Delta$*  cells cultured in eVOLVER. Treatment with 15 $\mu$ M thiamine and 500 $\mu$ M NAA was initiated at t=0hrs. Individual trendlines indicate replicates (N=2). Orange shaded portion represents the time period during which Epe1 has been depleted. (Right) Plot showing mean minimum decrease in growth rate for eVOLVER experiments of the indicated genotypes. N=3.
- (C) H3K9me3 ChIP-seq tracks of a 100kb window centered at the *clr4+* gene locus after five days of Epe1 depletion in *mst2 $\Delta$  epe1<sup>deg</sup> red1 $\Delta$*  cells. Enrichment is shown in log<sub>2</sub> fold change of IP normalized to input. Genotype is indicated on the left side of each track. Peaks identified are denoted in red below each track. The *clr4+* gene locus is specifically highlighted.
- (D) Heatmap showing loci of clustered H3K9me3 islands, originally identified in *mst2 $\Delta$  epe1<sup>deg</sup>*, in *mst2 $\Delta$  epe1<sup>deg</sup> red1 $\Delta$* . Peaks are centered in a 24kb window and are clustered by K-means clustering from figure 3E.
- (E) Schematic for adding an ectopic copy of *cdk9+* at the *leu1+* locus. Heterochromatin misregulation allows spreading of the *mei4+* heterochromatin island over neighboring *cdk9+*. Insertion of *cdk9+* at the euchromatic *leu1+* locus prevents transient silencing from heterochromatin spreading.
- (F) *clr4+* mRNA expression measured by qRT-PCR after five days of treatment with 15 $\mu$ M thiamine and 500 $\mu$ M NAA. Log<sub>2</sub> fold-change expression of mRNA is relative to mRNA expression without thiamine and NAA. Error bars represent standard deviation, N=3 or 6. Asterisk indicates  $p < 0.05$ .



339 deficient cultures displayed a significantly smaller decrease in growth rate, similar to *mst2Δ*  
340 *epe1<sup>deg</sup> clr4Δ*, compared to *mst2Δ epe1<sup>deg</sup>* or RNAi deletions (**Figure 5B**). We also  
341 compared *Clr4* mRNA between untreated *red1Δ* and *red1+* and that this lesser degree of  
342 *clr4+* silencing was not due to pre-adaptation in untreated *red1Δ* (**Figure S5D**). Hence, these  
343 results suggest that MTREC mediated *Clr4* recruitment may nucleate aberrant  
344 heterochromatin during the stress phase to drive downstream adaptation.<sup>63–65</sup>

345 To determine how heterochromatin changes in *mst2Δ epe1<sup>deg</sup> red1Δ* cells lead to  
346 reduced stress and delayed *clr4+* silencing, we acquired batch cultures over a 120 hour  
347 period. ChIP-seq revealed the accumulation of H3K9me3 over the *clr4+* locus exhibited a  
348 significant contraction relative to *mst2Δ epe1<sup>deg</sup> red1+* cells (**Figure 5C, S5E**). Additionally,  
349 during the stress period, *mst2Δ epe1<sup>deg</sup> red1Δ* cells lost several H3K9me3 islands at meiotic  
350 genes, including *mcp7*, *mcp5*, *mei4*, *ssm4*, and *mug1*, consistent with a role for Red1 in  
351 nucleating these islands in cycling cells (**Figure 5D**).<sup>56</sup> While the other H3K9me3 islands,  
352 originally identified in *mst2Δ epe1<sup>deg</sup>*, were still present, we observed that these remaining  
353 islands in *red1Δ* have less H3K9me3 enrichment at 48 hours compared to *red1+*. These  
354 H3K9me3 peaks also show less decay by 120 hours, possibly due to weaker *clr4+* silencing.  
355 These observations led us to test if any specific Red1 dependent H3K9me island expansions  
356 were primary drivers of the stress phase. We noted an expansion of H3K9me3 from the  
357 *mei4+* locus to a proximal gene, *cdk9+*. Cdk9 is an essential kinase that regulates various  
358 aspects of RNA polymerase II transcription including initiation, elongation and termination.<sup>66–</sup>  
359 <sup>68</sup> Specifically, *cdk9+* is silenced during the stress phase (24-48 hours) but is derepressed  
360 once adaptation is complete (120 hours) (**Figure 3E,G**). To compensate for Red1 mediated  
361 *cdk9+* silencing, we inserted a second copy of *cdk9+* at the *leu1+* locus in *mst2Δ epe1<sup>deg</sup>*  
362 (“2x *cdk9+*”) (**Figure 5E**). Our rationale was that the second copy of *cdk9+* would not be  
363 subject to the transient silencing effects, enabling us to isolate the effects of silencing *cdk9+*  
364 from the general effects of depleting Epe1. Indeed, we observed a weaker growth defect in  
365 colony size upon depletion of Epe1, compared to the original strain with one copy of *cdk9+*



366 **(Figure S5F)**. This was complemented with reduced *clr4+* silencing to a level that mirrored  
367 *mst2Δ epe1<sup>deg</sup> red1Δ*, suggesting that silencing of *cdk9+* is a key downstream event of Epe1  
368 depletion for both adaptive *clr4+* silencing as well as the intermediate, low fitness stress  
369 phase **(Figure 5F)**. Taken together, these results show that the expansion of  
370 heterochromatin islands, following the loss of Epe1, is crucial for cell stress and subsequent  
371 adaptation.

### 372 **Adaptive heterochromatin exhibits memory upon re-induction of stress**

373 As we previously showed, depletion of Epe1 is rapid and efficient, occurring in as  
374 little as 30 minutes after the addition of NAA and thiamine **(Figure 1C)**. Therefore, the  
375 *epe1<sup>deg</sup>* allele enables us to rapidly and reversibly cycle between Epe1 depletion and  
376 expression. To test whether cells that had adapted to Epe1 loss also exhibited memory, we  
377 restored Epe1 expression in adapted cells for different recovery periods. We refer to these  
378 recovery periods as **short** (24 hours), **medium** (48 hours) and **long** (72 hours). Following  
379 the recovery period, we re-initiated Epe1 depletion to generate a second stress phase  
380 **(Figure 6A-B)**. If *Clr4* silencing is faster during the second stress phase, it would imply that  
381 cells have the potential for adaptive memory, where an original lost adaptation can be  
382 recalled more quickly than the initial adaptive development.

383 As controls, untreated *mst2Δ epe1<sup>deg</sup>* cells exhibited smaller sized colonies with  
384 substantial heterogeneity upon Epe1 depletion **(Figure 6C)**. Adapted cells formed uniformly  
385 sized colonies upon sustained Epe1 depletion. In contrast, adapted cells that had  
386 experienced a short recovery dose of Epe1 (Epe1 re-expressed for 24 hours) produced an  
387 intermediate colony size phenotype, with a bimodal distribution of small and large colonies.  
388 These results suggest that some proportion of short recovery cells had reverted to the  
389 untreated state while others preserved the adapted state during the 2<sup>nd</sup> stress phase.  
390 Medium and long recovery cell populations produced colony size phenotypes that matched  
391 untreated cells, suggesting that a prolonged recovery phase (>24 hours) led to the complete  
392 loss of adaptive memory. Hence, our results reveal that a memory associated with

Figure 6: Adaptive heterochromatin exhibits memory upon re-induction of stress. Copyright holder for this preprint (which was not certified by peer review) is the author/funder. All rights reserved. No reuse allowed without permission.

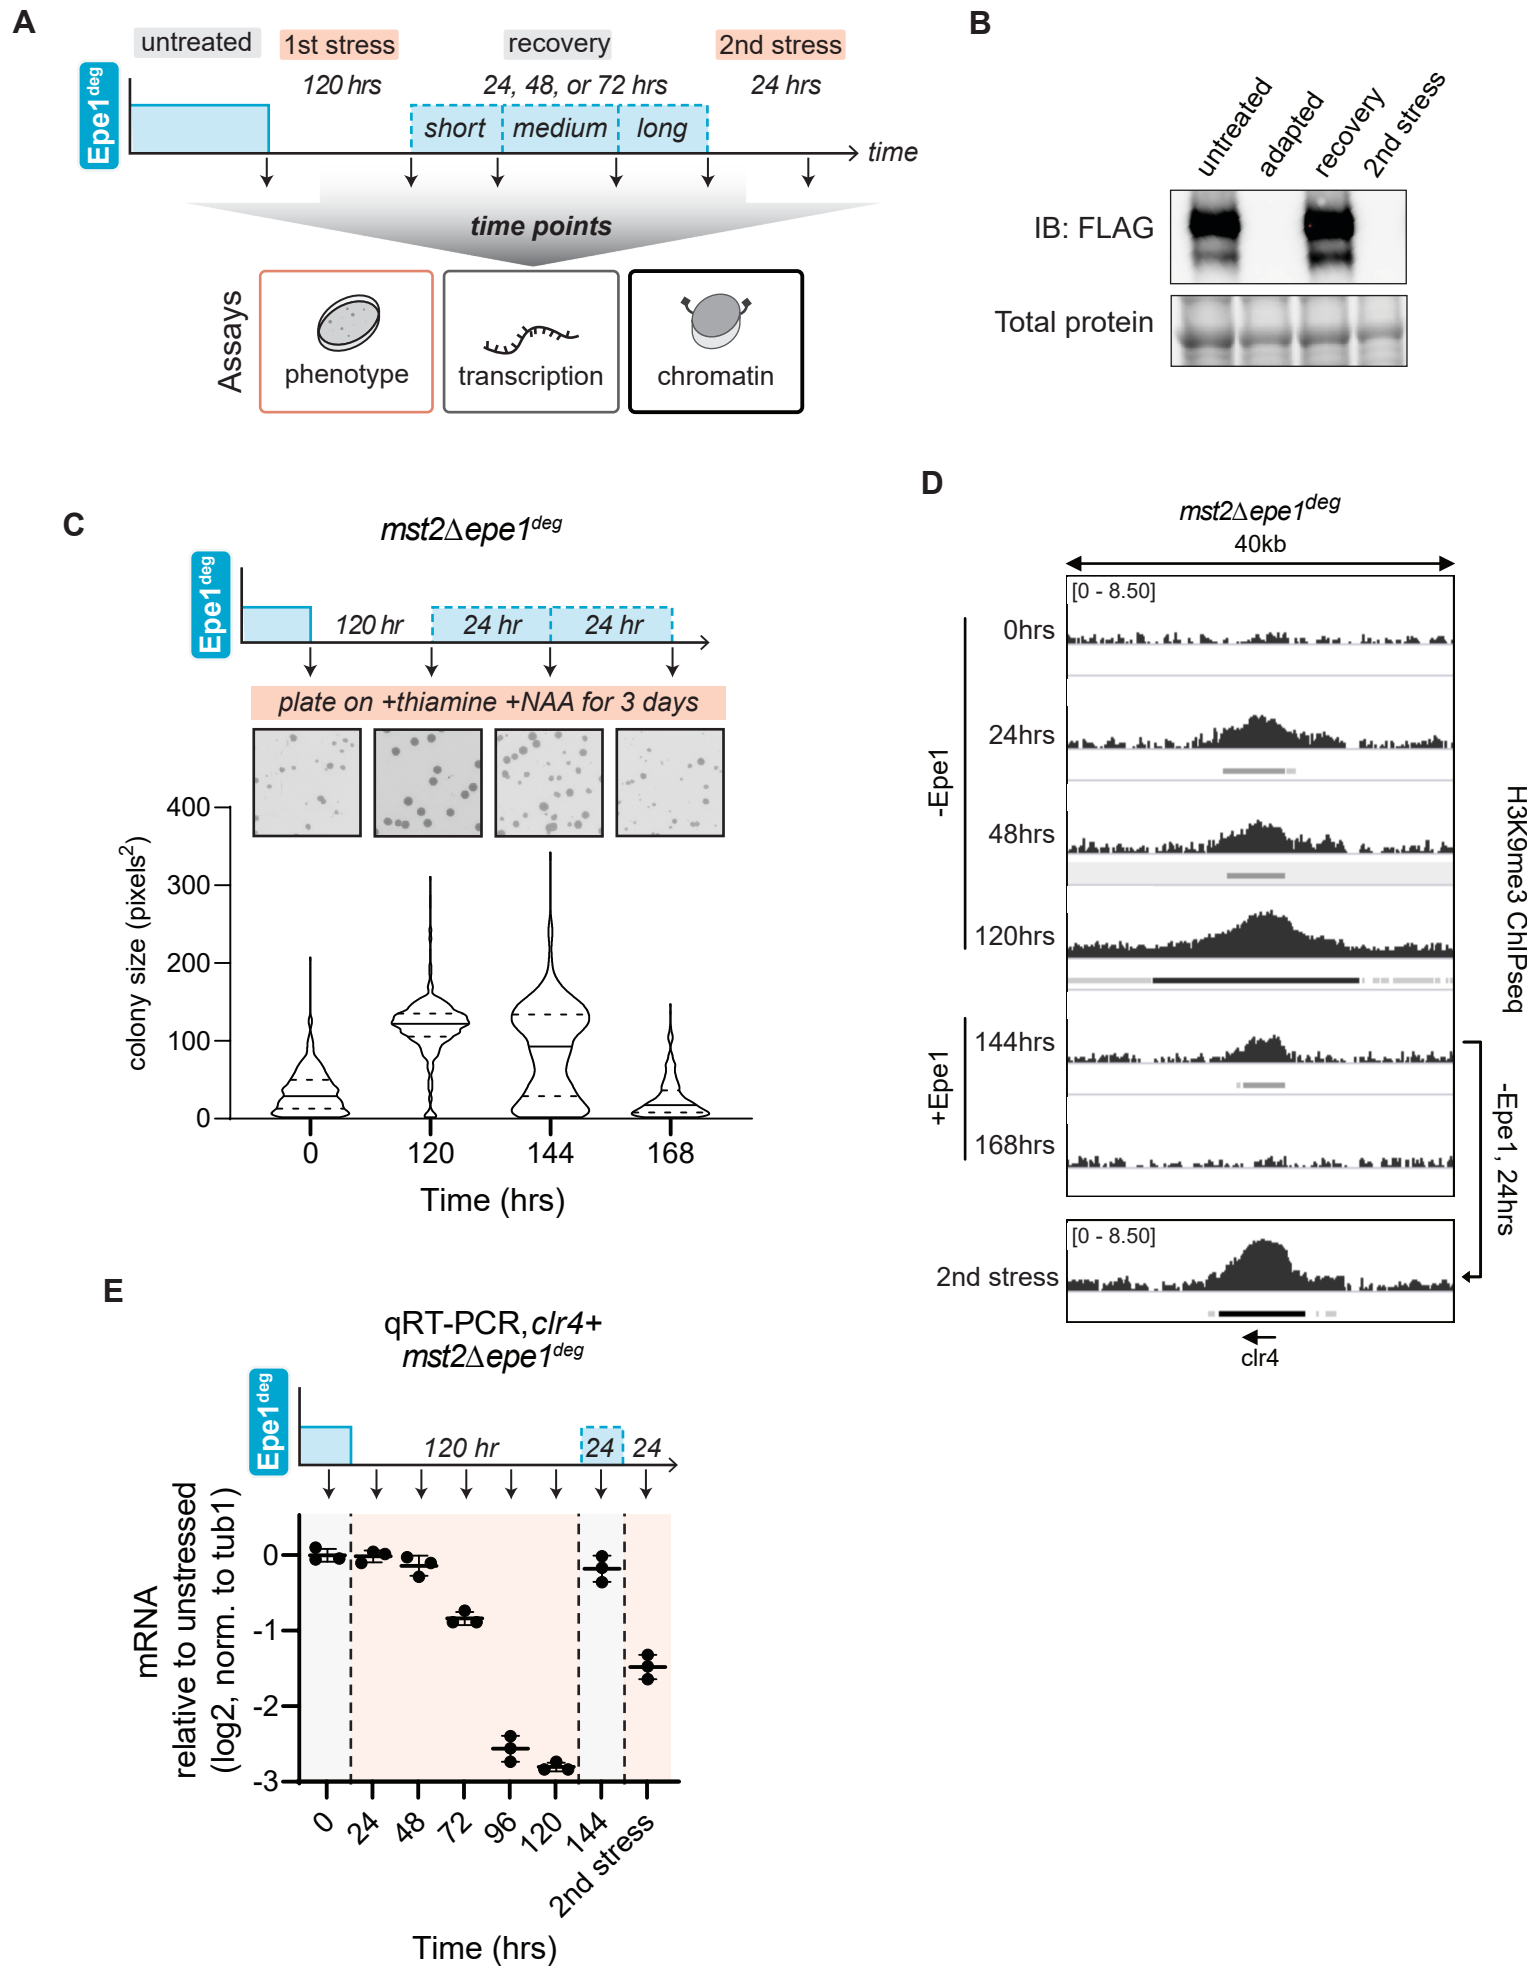

**Figure 6. Adaptive heterochromatin exhibits memory upon re-induction of stress.**

- (A) Schematic indicating cycling of Epe1 availability in *mst2Δ epe1<sup>deg</sup>* to measure epigenetic memory at the phenotype, transcription and chromatin level. Untreated cells express Epe1 and have not experienced heterochromatin misregulation. Adapted cells have experienced Epe1 depletion and silenced *clr4+* after 120 hours. Cells were allowed to recover with Epe1 expressed for 24, 48 or 72 hours, followed by a second round of Epe1 depletion.
- (B) Western blot for Epe1-3xFLAG-AID in *mst2Δ epe1<sup>deg</sup>* cells. Adapted and re-induced adapted cells were grown with 15μM thiamine and 500μM NAA for a minimum of 24hrs. Total protein levels are shown in the lower panel.
- (C) Colony size distribution of *mst2Δ epe1<sup>deg</sup>* cells, in pixel area, after three days of growth with Epe1 depletion from 15μM thiamine and 500μM NAA (Bottom). Epe1 expression and snapshots of culture plates (Top). Mean and st. dev of distributions in pixels<sup>2</sup>: 0 hours (34.5 ± 27.3), 120 hours (118.9 ± 37.6), 144 hours (87.3 ± 59.4), 168 hours (26.3 ± 25.9)
- (D) H3K9me3 ChIP-seq tracks in a 40kb window centered at the *clr4+* gene locus after five days of Epe1 depletion in an *mst2Δ* background. Enrichment is shown in log<sub>2</sub> fold change of IP normalized to input. Epe1 was depleted within the window of 0-120 hours. After 120 hours, Epe1 was expressed for a recovery period of 24, 48, or 72 hours. Recovered populations were then put under a second stress by depleting Epe1 for another 24 hours.. Peaks identified are denoted below each track. The *clr4+* gene locus is specifically highlighted.
- (E) mRNA expression in *mst2Δ epe1<sup>deg</sup>* cells measured by qRT-PCR for *clr4+*. Orange shaded portion represents the time period during which Epe1 has been depleted. Epe1 expression and time points are shown above the figure.

393 heterochromatin misregulation can persist for about 24 hours (~6-8 cell generations)  
394 following the removal of the initiating stress.

395 To measure memory at the chromatin level, we performed H3K9me2 and H3K9me3  
396 ChIP-seq on recovering *mst2Δ epe1<sup>deg</sup>* cells. A short recovery over 24 hours led to a  
397 reduction of H3K9me2 and H3K9me3 (equivalent to 24 hours of stress), and by medium  
398 recovery, adaptive H3K9me2 and H3K9me3 at *Clr4* had decayed to undetectable levels  
399 (**Figure 6D, S6**). To test if cells in short recovery could reestablish silencing at the *clr4+*  
400 locus, we reintroduced heterochromatin stress to short recovery cells by depleting Epe1 a  
401 second time. After stress reintroduction, short recovery cells re-established H3K9me3 much  
402 faster than untreated cells (24 hours in short recovery cells versus 72 hours in naive cells)  
403 (**Figure 6D**). These changes in *Clr4* adaptive heterochromatin are mirrored in *clr4+*  
404 transcription, as well. Recovering cells expressed *clr4+* at unstressed levels, while cells that  
405 have had a prior experience of stress quickly reestablished *clr4+* adaptive silencing (**Figure**  
406 **6E**). These results show that novel adaptive H3K9 methylation is maintained for several cell  
407 divisions during stress recovery, and this residual methylation can encode epigenetic  
408 memory to more rapidly reestablish adaptive silencing.

#### 409 **The time scale of adaptive memory can be tuned by histone acetylation**

410 Cells may need to extend or even erase memory associated with past events.<sup>33,36</sup> To  
411 identify other chromatin-based mechanisms that might modulate and enhance adaptive  
412 memory duration, we considered the interdependence of H3K9me with other histone  
413 modifications. Histone hyperacetylation (H3K9Ac, H3K14Ac, H3K18Ac) and histone turnover  
414 are characteristic features of actively transcribed genes, and loss of histone acetylation can  
415 promote heterochromatin inheritance.<sup>69,70</sup> Although *Mst2* has been deleted in our strains  
416 (*mst2Δ epe1<sup>deg</sup>*), it is possible that other histone acetyltransferases could play additive roles  
417 in tuning the length of adaptive memory.<sup>71</sup> We deleted a second acetyltransferase, *Gcn5*, in  
418 a *mst2Δ epe1<sup>deg</sup>* background (*mst2Δ gcn5Δ epe1<sup>deg</sup>*). Cells with the *mst2Δ gcn5Δ epe1<sup>deg</sup>*  
419 genotype grew comparably to *mst2Δ epe1<sup>deg</sup>* prior to Epe1 depletion, and indicated a slightly

420 stronger stress phenotype after loss of Epe1 (**Figure S7A**). Using this strain, we performed  
421 memory experiments as previously described where we now cycled *mst2Δ gcn5Δ epe1<sup>deg</sup>*  
422 cells between conditions where Epe1 was depleted or expressed. Unlike what we observed  
423 in cells where Gcn5 is present (memory decayed after the short recovery period), *mst2Δ*  
424 *gcn5Δ epe1<sup>deg</sup>* cells retained memory after short, medium, and long recovery periods. After  
425 each recovery period, colony sizes most closely resembled adapted colonies, implying that  
426 these cells may exhibit prolonged, adaptive memory (**Figure 7A**).

427         Next, we measured other molecular correlates of memory-*clr4+* mRNA levels and  
428 H3K9me3 levels at the *clr4+* locus using ChIP qPCR in *mst2Δ epe1<sup>deg</sup>* and *mst2Δ epe1<sup>deg</sup>*  
429 *gcn5Δ* populations. We made two important observations: First, during each recovery  
430 phase, *clr4+* mRNA levels reverted to high levels of transcription, matching what we typically  
431 observed in untreated cells. Supporting our model that H3K9me3 is required for epigenetic  
432 adaptive memory, all recovery phase *mst2Δ epe1<sup>deg</sup> gcn5Δ* cells retained H3K9me2 and  
433 H3K9me3 at the *clr4+* locus (**Figure 7B, S7B**). Hence, altering the chromatin state and the  
434 persistence of H3K9me3 at the *clr4+* locus has an additive effect on adaptive memory. By  
435 measuring total H3K14ac through western blotting, we found that deleting Mst2 led to a  
436 reduction in H3K14Ac and additionally deleting Gcn5 in this background eliminated nearly all  
437 available H3K14Ac in the cell population (**Figure S7C**). These results suggest that enhanced  
438 H3K9me, which arises from the absence of H3K14Ac, can tune the length of adaptive  
439 memory. This interdependence on post-translational modifications may allow for cells to  
440 rapidly toggle adaptive silencing states enabling them to extend (or erase) memory of past  
441 stress events.

442         Second, although H3K9me3 levels are higher in *gcn5Δ* than in *gcn5+* cells, the  
443 modification itself was not sufficient to have a repressive function during the recovery phase.  
444 Instead, *clr4+* adaptive silencing returned in an Epe1 depletion-dependent manner. When  
445 recovering *mst2Δ epe1<sup>deg</sup> gcn5Δ* was exposed to a 2<sup>nd</sup> stress, cells re-established *clr4+*  
446 silencing even though adaptive H3K9me3 maintained a similar distribution compared to the  
447 recovering population (**Figure 7B-C**). Taken together, our results imply that while H3K9

Figure 7: The time scale of adaptive memory can be tuned by histone acetylation  
 (which was not certified by peer review) is the author/funder. All rights reserved. No reuse allowed without permission.

A

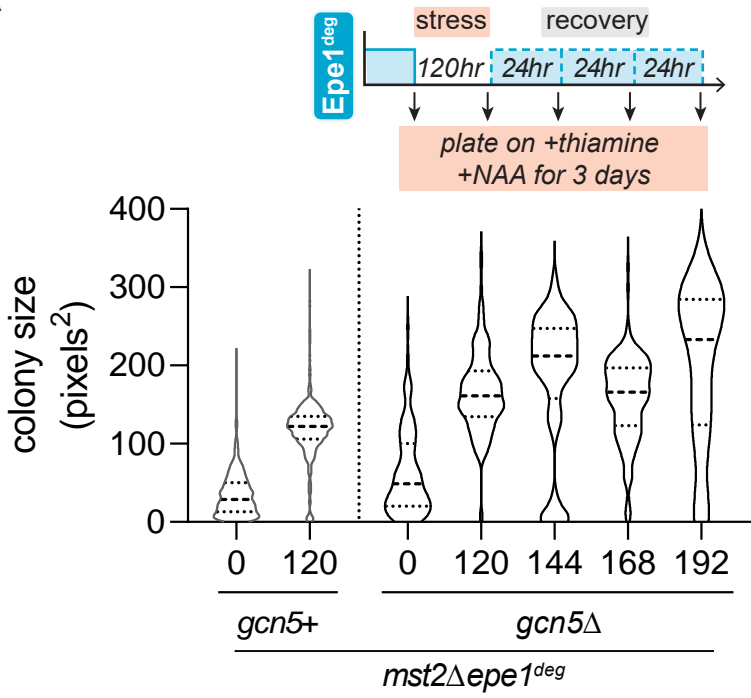

B

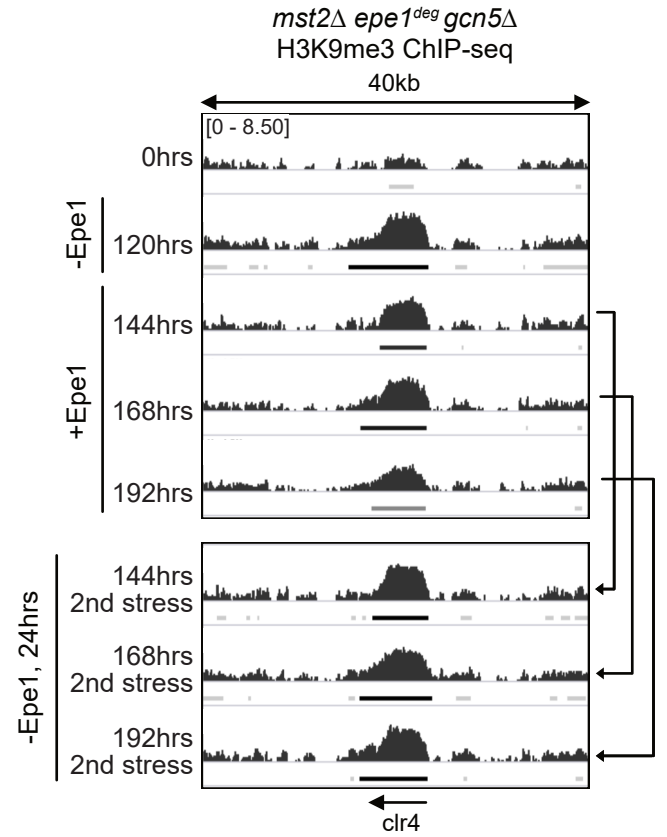

C

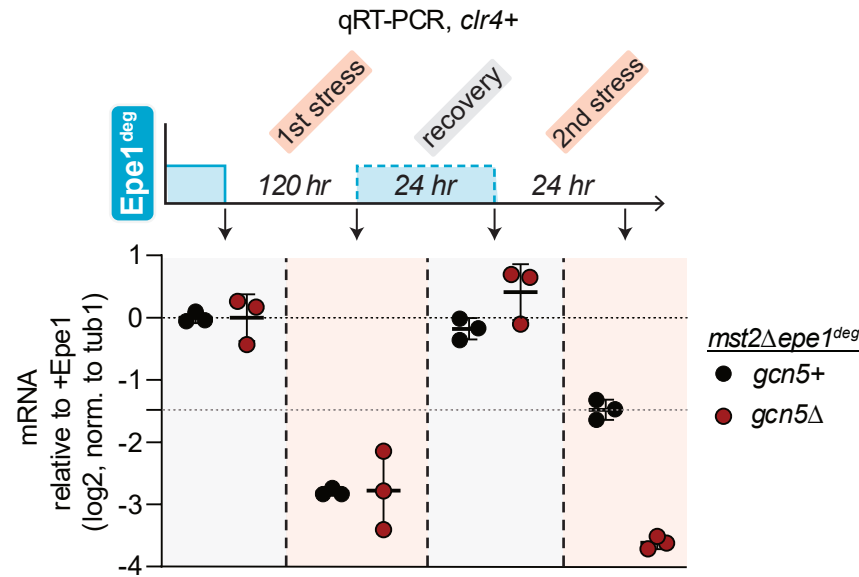

D

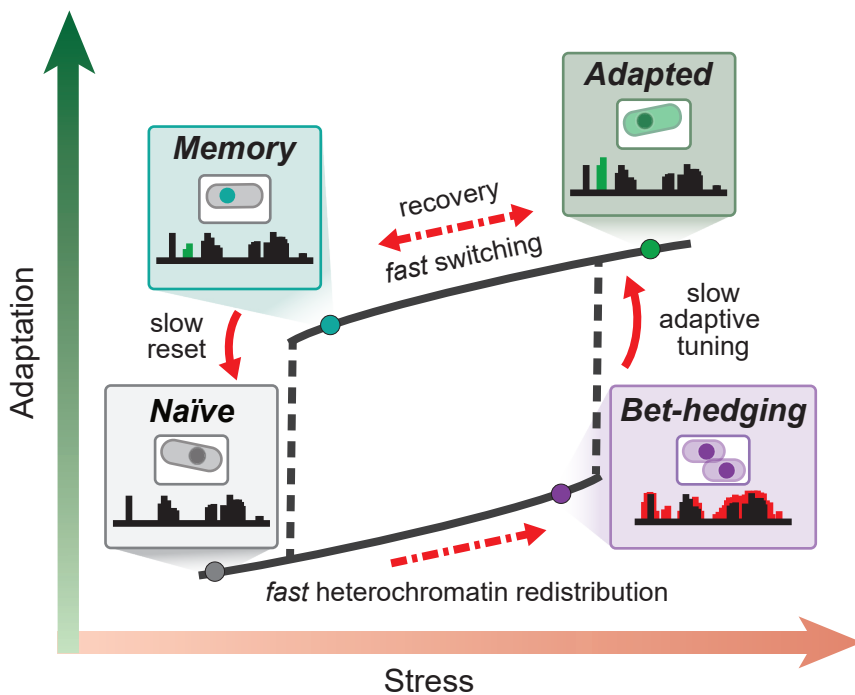

## Figure 7 The time scale of adaptive memory can be tuned by histone acetylation.

- (A) Colony size distribution of *mst2Δ epe1<sup>deg</sup> gcn5Δ* cells, in pixel area, after three days of growth with Epe1 depletion from 15μM thiamine and 500μM NAA. Distributions of *mst2Δ epe1<sup>deg</sup>* colony sizes are shown for comparison. Mean and st. dev of distributions in pixels<sup>2</sup>: 0 hours (61.9 ± 53.8), 120 hours (166.1 ± 50.9), 144 hours (185.8 ± 87.9), 168 hours (158.2 ± 54.0), 192 hours (201.1 ± 102.3)
- (B) H3K9me3 ChIP-seq tracks in a 40kb window centered at the *clr4+* gene locus after five days of Epe1 depletion in an *mst2Δ epe1<sup>deg</sup> gcn5Δ* background. Enrichment is shown in log<sub>2</sub> fold change of IP normalized to input. Epe1 was depleted within the window of 0-120 hours. After 120 hours, Epe1 was expressed for a recovery period of 24, 48, or 72 hours. Recovered populations were then put under a second stress by depleting Epe1 for another 24 hours. Peaks identified are denoted below each track. The *clr4+* gene locus is specifically highlighted.
- (C) *clr4+* mRNA expression in *mst2Δ epe1<sup>deg</sup> gcn5+* and *mst2Δ epe1<sup>deg</sup> gcn5Δ* cells measured by qRT-PCR. Orange shaded portion represents the time period during which Epe1 has been depleted.
- (D) Heterochromatin-defining H3K9 methylation (H3K9me), normally reserved to maintain genome integrity can be redistributed across the genome to establish new and potentially adaptive phenotypes. Establishing adaptive H3K9me patterns occurs over surprisingly slow time-scales relative to the initiating stress. The slow kinetics of adaptation may serve as a bet-hedging strategy for cells to decipher optimal survival solutions. Upon removal of stress, cells relax to new transcriptional and chromatin states rather than revert to their initial (ground) state, establishing a tunable memory for a future adaptive epigenetic response. Cells exhibit history dependence wherein a prior exposure to stress locks cells in a new transcriptional state that encodes adaptive memory.



448 methylation has an important role in preserving memory associated with Clr4 silencing, it  
449 may not be the only factor that contributes to this process (**Figure 6D-E, S6, 7B-C**).  
450 Therefore, we tested whether short recovery cells exhibited unique transcriptional changes  
451 that could account for adaptive memory and silencing by performing RNA-seq analysis on  
452 short and medium recovery *mst2Δ epe1<sup>deg</sup>* cell populations. Indeed, PCA reveals that cells  
453 during recovery phases exhibit unique transcriptional dynamics that were distinct from  
454 untreated, stress, or adapted phase cells (**Figure S7D**). Importantly, the cell transcriptional  
455 state when Epe1 is re-expressed does not instantaneously revert to the initial untreated  
456 state. Transcriptional changes in the short recovery phase were primarily enriched for genes  
457 related to ncRNA and rRNA processing, ribosome biogenesis, and RNA metabolic  
458 processes (**Figure S7E**). We also observed enrichment for CESR transcripts, suggesting  
459 that the shift from the adapted state and loss of heterochromatin at *clr4+* activates part of a  
460 stress response. Since we have previously implicated MTREC in adaptive Clr4 silencing, we  
461 examined known Red1 targets (**Figure S7F**).<sup>73,74</sup> We observed large transcriptional changes  
462 in Red1 targets during both the stress and recovery phase, reinforcing the causal role that  
463 MTREC has in adaptive Clr4 silencing.

## 464 **DISCUSSION**

465 Cells can repurpose and leverage existing epigenetic pathways to modulate gene  
466 expression states in response to environmental change. In fission yeast, H3K9 methylation  
467 exhibits adaptive epigenetic potential that is unlocked when cells encounter various  
468 environmental stressors, including anti-fungals, caffeine, or nutrient restriction.<sup>21,39,57,75,76</sup>  
469 These stressors impact two major H3K9me regulators, Epe1 and Mst2 at the RNA and  
470 protein level. Our ability to control Epe1 and Mst2 levels (in our *mst2Δ epe1<sup>deg</sup>* and *mst2<sup>deg</sup>*  
471 *epe1<sup>deg</sup>* strains), rapidly and reversibly enables us to mimic the natural stress response of  
472 fission yeast cells, independent of an initiating stress. Based on previous research and our  
473 work, we propose the following model for epigenetic adaptation. Exposure to stress impacts  
474 Epe1 and Mst2 levels in *S.pombe* cells. Epe1 undergoes proteasome mediated degradation



475 while Mst2 produces a shorter, MYST-domain deficient isoform in a stress-dependent  
476 manner.<sup>21,57</sup> Manifesting a stress-driven slow growth phenotype would allow time for an  
477 adaptive silencing pathway to establish H3K9me at new locations in the genome. While our  
478 inducible depletion system has several controlled variables that separate it from a natural  
479 system, it undeniably provides a window into the earliest transcriptomic changes that cells  
480 undergo prior to adaptation.

481 Our system enables the capture of early and intermediate transcriptional states that  
482 lead to adaptive silencing of *clr4+* which would be impossible to capture using conventional  
483 genetic methods.<sup>47</sup> Notably, we found that the decision for cells to adapt and silence *clr4+* is  
484 a slow process, taking up to 120 hours, which is two orders of magnitude slower than the  
485 timescale of Epe1 depletion (approximately 30 minutes). We propose that these slow  
486 dynamics may represent a bet-hedging strategy, where cells reversibly sample different  
487 transcriptional states to enhance fitness before converging on an optimal solution.<sup>77</sup> Our  
488 findings parallel stochastic tuning models in budding yeast, which posit that transcriptional  
489 noise is positively selected to promote cell survival in novel environmental conditions.<sup>24,25</sup>

490 By analyzing the transcriptomic profile of cells, we observed transient activation of  
491 stress response pathways correlating with a slow growth phenotype. Activation of genes  
492 associated with the core environmental stress response (CESR) serve as an on-pathway  
493 intermediate preceding adaptation.<sup>60</sup> These dynamics strikingly resemble how cancer cells  
494 often vexingly develop resistance, resulting in poor prognosis and treatment outcomes. For  
495 example, glioblastoma cells transiently exit the cell cycle, exhibit slow growth, misregulate  
496 H3K27 methylation-dependent epigenetic pathways, and ultimately adapt by entering a state  
497 that is refractory to chemotherapeutic interventions.<sup>19</sup> Bacteria also enter slow-growing  
498 persister states through the activation of a stress-induced SOS pathway, leading to genetic  
499 changes and antibiotic resistance.<sup>8,78</sup> In both instances, slow growth is a common  
500 denominator that is triggered by the activation of the stress response pathway. Thus, the

501 activation of stress response pathways may represent a general principle that cells leverage  
502 to explore adaptive phenotypes when exposed to novel environments.<sup>60</sup>

503         It is possible that the initial, unregulated expansion of H3K9me during early  
504 heterochromatin misregulation leads to the silencing of many essential genes that disrupt  
505 fitness and cell survival. We speculate that this could represent a temporary switch in growth  
506 strategy to a slow proliferation state until beneficial adaptations can be acquired. The  
507 expansion of heterochromatin domains over essential genes could also act as a filter for  
508 stress and adaptive responses. Since the spatial expansion of heterochromatin must build  
509 over time, cells would need to experience sustained exposure to a stressor before  
510 committing to adaptive H3K9me redistribution, preventing premature adaptive responses to  
511 transient environmental perturbations.

512         Establishing adaptive heterochromatin at the *clr4+* locus follows unique dynamics  
513 that are distinct from H3K9me-spreading at other regions during heterochromatin  
514 misregulation. These dynamics suggest active recruitment of heterochromatin initiation and  
515 maintenance factors that have adaptive potential. This process is partially dependent on  
516 Red1, as *mst2Δ epe1<sup>deg</sup> red1Δ* cells consistently show weaker *clr4+* adaptive silencing within  
517 our 120-hour window, and an increase in fitness during the stress phase. This raises the  
518 possibility that adaptive silencing is mediated by co-transcriptional or post-transcriptional  
519 processes that involve non-coding RNA recognition by factors that are part of the MTREC  
520 complex.<sup>56,61,62</sup> The expansion of Red1-dependent H3K9me islands during the stress phase  
521 contributes to activating stress response pathways, thus explaining why deleting Red1  
522 alleviates stress and leads to slower *clr4+* silencing. How this RNA elimination machinery  
523 affects the formation of *de novo* adaptive heterochromatin in other stress contexts, and the  
524 extent to which it can be repurposed when cells encounter novel environments, requires  
525 further investigation. Our results from relocating *cdk9+*, an essential gene that is subject to  
526 transient Red1 silencing during the stress phase, support an essential role for Red1 during  
527 stress and subsequent adaptation. These results also reveal how the arrangement of genes

528 on chromosomes could confer unforeseen advantages for cell survival when exposed to  
529 acute stress. This is particularly intriguing given that the *mei4+* and *cdk9+* preserve synteny  
530 even in the highly diverged *Schizosaccharomyces japonicus*, suggesting how the potential  
531 for organisms to adapt could be an emergent property that shapes genome organization.<sup>79</sup>  
532 Additionally, our results mirror recent work where inhibition of the human CDK9 ortholog  
533 produces transcriptional reprogramming, supporting a model where the inhibition or transient  
534 repression of essential genes encourages epigenetic adaptations.<sup>80</sup> How other transiently-  
535 silenced essential genes, including the previously identified *cup1+* gene, modulates the  
536 formation of epigenetic adaptations requires further investigation.

537 Our unique ability to toggle between Epe1 removal and expression enabled us to  
538 determine that cells can retain a memory associated with prior heterochromatin  
539 misregulation for approximately 6-8 generations following the initial stress. This memory  
540 depends on residual H3K9 methylation which qualitatively resembles earlier work where  
541 adding back Epe1 permanently poises cells in a novel, fixed epigenetic state.<sup>81</sup> In contrast,  
542 re-expressing Epe1 in our inducible system leads to total *clr4+* derepression despite  
543 significant H3K9me3 being present during the recovery phase. Retained H3K9me3 levels at  
544 the *clr4+* locus are even more strongly retained in recovering *mst2Δ gcn5Δ epe1<sup>deg</sup>* cells, and  
545 yet *clr4+* continues to be expressed upon the reintroduction of Epe1. One possibility is that  
546 H3K9me3 is required for memory but silencing requires additional inputs from other factors  
547 involved in different tiers of transcriptional, co-transcriptional and post-transcriptional  
548 regulation.<sup>82–85</sup> We speculate that memory and subsequent adaptive silencing may depend,  
549 not only on H3K9me3, but also on the cell being poised to adapt due to novel network-level  
550 gene expression changes.<sup>27,54,86</sup> Our RNA-seq measurements and PCA analysis firmly  
551 support the idea of new adaptive cell states that can potentially encode memory. Cells in  
552 which Epe1 has been reintroduced during the recovery phase exhibit unique gene  
553 expression signatures, distinct from the untreated state. We propose that this feature  
554 represents a form of cellular hysteresis, or history dependence, in which case the gene

555 regulatory network in cells is completely rewired upon either removing or adding back Epe1  
556 (**Figure 7E**).<sup>87</sup> It remains to be seen whether other epigenetic regulators also exhibit  
557 hysteresis given the slow kinetics of establishing novel epigenetic states *de novo*.<sup>88</sup>

558 In conclusion, our inducible system uniquely allowed us to capture the highly  
559 dynamic and unexpected changes in gene expression and chromatin states following acute  
560 heterochromatin misregulation in yeast populations, changes that would be otherwise  
561 obscured in conventional genetic assays. Using this approach, we could faithfully reconstruct  
562 the pathways that cells undertake prior to and during adaptation as well as investigate how  
563 the adapted state is memorized across multiple generations. Our findings reveal several key  
564 and distinguishing features of adaptation by epigenetic responses, including the slow  
565 kinetics of the process consistent with the concept of epigenetic bet-hedging, and the  
566 establishment of adaptive memory that is influenced by cellular history. This work also  
567 illuminates strategies by which cells stabilize new gene expression programs to endure  
568 environmental change, with implications across biology from development to evolution.  
569 Ultimately, we demonstrate a powerful experimental framework to probe adaptation  
570 mediated through chromatin regulation - an exciting frontier offering new insights into  
571 phenotypic plasticity and organismal responses to transient stresses.

## 572 **LIMITATIONS OF THE STUDY**

573 Our work utilizes an inducible, on-demand system to initiate and track an adaptive  
574 epigenetic response upon removing or adding back key heterochromatin regulators in  
575 *S.pombe*. Natural stressors would likely elicit additional interspersed transcriptomic changes  
576 beyond what we observed. For example, caffeine affects DNA replication, so cells would  
577 experience both an adaptive response and replication stress. Nevertheless, understanding  
578 how entangled transcriptomic changes enable successful adaptation to stress will be an  
579 important area for future investigation. Our current population-level studies do not capture  
580 cell-to-cell heterogeneity in the specific choice of *clr4+* as the primary locus enabling the  
581 observed epigenetic adaptation. By profiling transcriptomic changes at the single cell level

582 over time, future work could delineate the diversity of molecular paths individual cells take  
583 before converging on an apparent optimal solution. These experiments may reveal whether  
584 the adaptive mechanism is purely stochastic across cells or if certain deterministic factors  
585 target the response to specific loci. Capturing single cell dynamics will add a valuable layer  
586 of understanding on top of the population-wide measurements we have conducted so far.

## 587 **METHODS**

### 588 **Yeast strains, plasmid construction, and culturing**

589 All *S. pombe* yeast strains used in this study were generated using either established  
590 methods for lithium acetate or electroporation transformations, or by meiotic crossing  
591 followed by tetrad dissection. All strains were genotyped using a colony PCR protocol.  
592 Plasmid constructs to create modified nmt81-Epe1-3xFlag-AID and nmt81-Mst2-3xFlag-AID  
593 inserts were constructed by modifying an existing pFA6a 3xflag AID IAA-17 degron kanMX6  
594 plasmid. Full plasmids were made using ligation methods following PacI digestion to insert  
595 the nmt81 promoter. This insert repaired the PacI site, allowing for a second PacI digestion  
596 to insert the CDS for Epe1 or Mst2.

597 EMMC was used as the base media for all cell culturing experiments, and all cultures were  
598 grown at 32C. For experiments involving sampling cultures over a time-course, a small  
599 volume of cells from each timepoint culture was used to nucleate the culture for the next  
600 timepoint in the appropriate media. All strains used in this study are listed in Table 1.

601 For colony size quantification, seed cultures were grown overnight at 32C in EMMC in liquid  
602 media. Seed cultures were then used to nucleate fresh liquid cultures at a low starting OD (<  
603 0.3 OD) and allowed to grow for about 6-8 hours. An equivalent number of cells were then  
604 diluted and plated on solid media, either EMMC or EMMC media supplemented with 15 $\mu$ M  
605 thiamine and 500 $\mu$ M NAA and spread with sterile glass beads. Plated cultures were grown  
606 at 32C, and pictures were taken at 3 and 5 days from plating on a Biorad ChemiDoc with  
607 white epifluorescence. Images were analyzed in FIJI for trimming plate edges, identifying

608 individual cell colonies, and quantifying colony number and size. To calculate percentage  
609 survival, we calculated colony count ratios between EMMC and EMMC media supplemented  
610 with 15 $\mu$ M thiamine and 500 $\mu$ M NAA.

### 611 **Western blotting**

612 To test time-dependent depletion of Epe1, cultures were seeded at a low OD (~0.3) in liquid  
613 media EMMC or EMMC supplemented with 15 $\mu$ M thiamine and 500 $\mu$ M NAA. For later  
614 memory experiments that switched Epe1 expression, cells cultured for five days in 15 $\mu$ M  
615 thiamine and 500 $\mu$ M NAA were harvested and a portion of the culture was used to start a  
616 new overnight culture in EMMC. This EMMC culture was then both harvested after 24 hours  
617 and used to inoculate a new culture in 15 $\mu$ M thiamine and 500 $\mu$ M NAA for a second time.  
618 That culture was then sampled after an additions 24 hours. All cultures were harvested by  
619 centrifuging 3-5 OD, decanting supernatant, and storing harvested pellets at -80C.

620 To extract protein for immunoblotting, cell pellets were processed using a standard TCA  
621 precipitation protocol. Pellets were washed with 1mL of ice cold water, then resuspended in  
622 150uL of YEX buffer (1.85 M NaOH, 7.5% beta-mercaptoethanol). Resuspended pelleted  
623 were incubated on ice for ten minutes, then 150uL of 50% TCA was mixed into each sample  
624 and incubated for ten minutes on ice. Samples were then centrifuged for 5 minutes at 13000  
625 rpm at 4C, after which the supernatant was decanted. Pellets were then resuspended in  
626 SDS sample buffer (125mM TRB pH 6.8, 8M urea, 5% SDS, 20% glycerol, 5% BME) and  
627 centrifuged for 5 minutes at 13000 rpm at 4C. Samples were then run on an SDS page gel at  
628 45 minutes at 200V. Stain-free imaging was performed on a Biorad ChemiDoc. Gel transfer  
629 was then performed on a Trans-Blot Turbo Transfer to a nitrocellulose membrane.

630 Immunoblotting was performed by blocking the nitrocellulose membrane with 5% non-fat dry  
631 milk in Tris-buffered saline pH 7.5 with 0.1% Tween-20 (TBST) for about an hour. Blots were  
632 then incubated overnight with primary antibody at 4C, then washed with TBST three times  
633 and incubated with secondary antibody for an hour. Incubated blots were imaged using  
634 enhanced chemiluminescence on a Biorad ChemiDoc.

## 635 **eVOLVER growth assay**

636 Continuous culture experiments were performed in eVOLVER, designed and set up as  
637 previously described<sup>52</sup>. Two replicate cultures of each strain were grown in 25 mL of EMMC  
638 media at 32 C. Growth was maintained in log phase using “turbidostat” mode to constrain  
639 optical density between 0.1 and 0.6. When cultures rise beyond the maximum OD, a dilution  
640 event is triggered, and growth rate is calculated for the duration since the previous dilution  
641 by fitting OD measurements to the exponential equation:  $OD_{600} = (initial\ density) * e^{(growth\ rate) * (time)}$ . Media condition changes were executed by spiking individual culture  
642 vials as well as the input EMMC media with a 1000x concentrated solution of thiamine +  
643 NAA in DMSO. Influx and efflux operations were manually triggered to flush untreated media  
644 from the lines.  
645

646 To calculate the time derivative decrease in growth rate post-Epe1 depletion, first 60 hrs (2.5  
647 days) after addition of thiamine and NAA were considered. Time derivatives of growth rate  
648 were calculated at each pair of consecutive growth rates with MATLAB's gradient function. A  
649 moving average with a sliding window of length 3 was applied to the time derivative of the  
650 growth rate, and the minimum of this moving average was found to be the minimum change  
651 in growth rate for each experiment vial. Subsequently, the average and standard deviation of  
652 the minimum change in growth rate was calculated across triplicate experiment vials.

## 653 **qRT-PCR and RNA sequencing analysis**

654 Cultures were grown in liquid culture containing either EMMC media or EMMC media  
655 supplemented with 15 $\mu$ M thiamine and 500 $\mu$ M NAA. For *mst2* $\Delta$  *epe1*<sup>deg</sup> time points 0-120hrs,  
656 cells were cultured and harvested from eVOLVER. For memory RNA experiments, *mst2* $\Delta$   
657 *epe1*<sup>deg</sup> cells were grown in manually maintained incubated cultures. Cells were grown to  
658 0.3-1.0 OD and harvested by centrifuging ~10mL of culture at 2000 rpm for 2 minutes. Cell  
659 pellets were washed once in distilled water, centrifuged at 5000 rpm for 30 seconds, and  
660 stored at -80C.



661 Stored pellets were thawed on ice for 5 minutes, then resuspended in 750uL TES buffer  
662 (0.01M Tris pH7.5, 0.01M EDTA, 0.5% SDS). 750uL acidic phenol chloroform was  
663 immediately added afterwards, samples were vortexed, and then incubated on a heat block  
664 at 65C. Samples were incubated for a total of 40 minutes, with 20 seconds of vortexing  
665 every 10 minutes. Afterwards, heated samples were placed on ice for 1 minute, shaken, and  
666 transferred to phase lock tubes. Phase lock tubes were centrifuged for 5 minutes at 13,000  
667 rpm at 4C, and the aqueous phase was transferred to a clean Eppendorf tube and ethanol  
668 precipitated. Isolated nucleic acids were then treated with DNase I at 37C for 10 minutes  
669 and cleaned up on Qiagen RNeasy Clean-Up columns. Purified total RNA was converted to  
670 cDNA by annealing reverse primers complementary to target genes and reverse transcribing  
671 with SuperScript III Reverse Transcriptase (Invitrogen). qRT-PCR was performed with SYBR  
672 Green dye on a CFX Opus 384 Real-Time PCR System. All qRT experiments were  
673 reproduced for at least three independently growth replicates.

674 Libraries were prepared and sequencing was performed commercially. Raw fastq files were  
675 evaluated using FastQC (v0.11.9) and trimmed using Trimmomatic (v0.39) and aligned to  
676 the ASM294v2 *S. pombe* reference genome using STAR (v2.7.8a) then indexed using  
677 samtools (v1.10) (Andrews, 2010; Bolger et al., 2014; Dobin et al., 2013; Danecek et al.,  
678 2021). Bam files were grouped by genotype replicate and differential expression analysis  
679 was performed through Defined Region Differential Seq in the open source USEQ program  
680 suite (v9.2.9) (<http://useq.sourceforge.net>; Love et al., 2014). The cutoff for significant  
681 differential expression of pairwise gene comparisons was defined as a P value of <0.01  
682 (prior to phred transformation) after Benjamini and Hochberg multiple testing corrections. For  
683 principal component analysis, rlog counts were used to perform MDS analysis, and custom  
684 ggplot2 R scripts were used to generate scatterplot figures. Volcano plots were drawn using  
685 the ggplot2 library, and heatmaps were drawn using the pheatmap library, as well as the  
686 standard R library and functions. Gene Ontology analysis was performed using the web-  
687 based tool AnGeLi with a p-value cutoff of < 0.01 with FDR correction for multiple testing and



688 default settings (Britton et al., 2015). Raw and processed data are deposited in GEO under  
689 the accession number GSE235808.

### 690 **Chromatin immunoprecipitation, ChIP-seq library preparation and analysis**

691 Cultures were grown in liquid culture containing either EMMC media or EMMC media  
692 supplemented with 15 $\mu$ M thiamine and 500 $\mu$ M NAA in manually maintained incubated  
693 cultures. Cells were grown to mid-log phase (0.9-1.6 OD) and then harvested by fixation with  
694 1% formaldehyde for 15 minutes then quenched with glycine for 5 minutes. Fixed cultures  
695 were then centrifugated, washed twice with 1xTBS, and stored at -80C. To process samples,  
696 frozen pellets were thawed at RT for 5 minutes, then resuspended in 300  $\mu$ L chip lysis buffer  
697 (50 mM HEPES-KOH, pH 7.5, 100 mM NaCl, 1 mM EDTA, 1% Triton X-100, 0.1% SDS, and  
698 protease inhibitors). Glass beads (500 $\mu$ L, 0.5mm) were added to each tube and cells were  
699 lysed by bead beating in an Omni Bead Ruptor at 3000 rpm  $\times$  30 s  $\times$  10 cycles. Ruptured  
700 cells were then collected by using a heated sterile needle to pierce the bottom of each tube,  
701 then collecting the lysate in a fresh tube via centrifugation. Lysate was then sonicated in a  
702 Q800R3 Sonicator to fragment sizes ranging from 100-500 base pairs. Sonicated lysate was  
703 then centrifuged at 13,000 rpm for 15 minutes at 4C, and the liquid portion was transferred to  
704 a new tube. Protein content was normalized using a Bradford assay. 25 $\mu$ L of each sample  
705 was reserved as input, to which 225 $\mu$ L 1xTE/1%SDS was added. Protein A Magnetic  
706 Dynabeads were preincubated with either Anti-H3K9me2 [Abcam, ab1220] or Anti-H3K9me3  
707 [Active Motif, 39161] antibody. 30 $\mu$ L beads preincubated with 2 $\mu$ g antibody was added to  
708 500 $\mu$ L cell lysate and incubated for 3 hours at 4C. Beads were held on a magnetic stand for  
709 subsequent washing cycles. For each wash cycle, cells were centrifuged at 1000 rpm for 1  
710 minute at 4C, placed on the magnetic stand and allowed to settle, then liquid was removed  
711 by vacuum pipette. Then 1mL wash buffer was added and samples were rotated for 5  
712 minutes per wash. Samples were washed three times with chip lysis buffer, then once with  
713 1xTE. Samples were then eluted by suspending the beads in 100 $\mu$ L 1xTE/1%SDS for 5  
714 minutes at 65C, then extracting liquid. A second elution was performed with 150 $\mu$ L

715 1xTE/0.67%SDS. Input and immunoprecipitated samples were then incubated overnight at  
716 65C. We then added 60ug glycogen, 100ug proteinase K, 44uL of 5M LiCl, and 250uL of  
717 1xTE was added to each sample and incubated at 55C for 1 hour. DNA was then extracted  
718 using phenol chloroform extraction, followed by ethanol precipitation. Ethanol precipitated  
719 pellets were resuspended in 100uL 10mM Tris pH 7.5 and 50mM NaCl. qPCR was  
720 performed with SYBR Green dye on a CFX Opus 384 Real-Time PCR System. All ChIP  
721 experiments were reproduced for at least two independently grown replicates.

722 Libraries were prepared following the standard protocol for the NEBNext Ultra II DNA Library  
723 Prep kit. Libraries of *mst2Δ epe1<sup>deg</sup> gcn5Δ* cells were sequenced on an Illumina Miseq, and  
724 all other libraries were sequenced on an Illumina Nextseq instrument. Raw fastq reads were  
725 evaluated using FastQC (v0.11.9) and trimmed using Trimmomatic (v0.39) (Andrews, 2010;  
726 Bolger et al., 2014). Trimmed reads were aligned to the ASM294v2 *S.pombe* reference  
727 genome using the Burrows-Wheeler Aligner (v0.7.17) and bam files were further processed  
728 using samtools (v1.10) (Li and Durbin, 2010; Danecek et al. 2021). Bedgraph coverage files  
729 were generated using deepTools (v3.5.1) and normalized IP against input in SES mode  
730 (Ramírez et al., 2016; Diaz et al., 2012). ChIP-seq H3K9me3 peaks were called using  
731 MACS2 with -g 12.57e6 in broad mode with a cutoff of 0.05 (Zhang et al., 2008). Bedtools  
732 intersect (v2.27.1) was used to identify genes overlapping with identified peaks. Heatmaps  
733 were generated using deepTools (v3.5.1) (Ramírez et al., 2016). Specific peak histograms  
734 were generated using the SushiR package and custom R scripts. Raw and processed data  
735 are deposited in GEO under the accession number GSE235808.

## 736 **ACKNOWLEDGMENTS**

737 The authors declare no competing interests. We thank Danesh Moazed for sharing fission  
738 yeast strains used in this study. We thank Nidhi Khurana and Gulzhan Raiymbek for their  
739 support in obtaining preliminary data during the initial phase of this study. We thank Basila  
740 Moochickal Assainar, Amanda Ames, and Sumanth Maheshwaram for their supportive and  
741 insightful feedback regarding this study. We thank Tommy V. Vo for helping with ChIP-seq

742 analysis. This work was supported by the National Science Foundation (NSF) (grant no. EF-  
743 1921677 to K.R. and A.S.K.), National Institutes of Health (NIH) (grant nos. R35GM137832  
744 to K.R.; R01EB029483, R01EB027793, and R01AI171100 to A.S.K.), American Cancer  
745 Society (grant no. RSG2211701DMC to K.R.); T32GM007544 to A.L.; T32GM007315 to  
746 M.S.), Department of Defense Vannevar Bush Faculty Fellowship (no. N00014-20-1-2825 to  
747 A.S.K.), and Schmidt Science Polymath Award (no. G-22-63292 to A.S.K.).

## 748 REFERENCES

- 749 1. Brooks, A.N., Turkarslan, S., Beer, K.D., Yin Lo, F., and Baliga, N.S. (2011). Adaptation of  
750 cells to new environments. *WIREs Mechanisms of Disease* 3, 544–561. 10.1002/wsbm.136.
- 751 2. Gasch, A.P., Spellman, P.T., Kao, C.M., Carmel-Harel, O., Eisen, M.B., Storz, G.,  
752 Botstein, D., and Brown, P.O. (2000). Genomic Expression Programs in the Response of  
753 Yeast Cells to Environmental Changes. *MBoC* 11, 4241–4257. 10.1091/mbc.11.12.4241.
- 754 3. Alberts, B. ed. (2002). *Molecular biology of the cell* 4th ed. (Garland Science).
- 755 4. Fisher, M.C., Alastruey-Izquierdo, A., Berman, J., Bicanic, T., Bignell, E.M., Bowyer, P.,  
756 Bromley, M., Brüggemann, R., Garber, G., Cornely, O.A., et al. (2022). Tackling the  
757 emerging threat of antifungal resistance to human health. *Nat Rev Microbiol* 20, 557–571.  
758 10.1038/s41579-022-00720-1.
- 759 5. Flavahan, W.A., Gaskell, E., and Bernstein, B.E. (2017). Epigenetic plasticity and the  
760 hallmarks of cancer. *Science* 357, eaal2380. 10.1126/science.aal2380.
- 761 6. Baker, S., Thomson, N., Weill, F.-X., and Holt, K.E. (2018). Genomic insights into the  
762 emergence and spread of antimicrobial-resistant bacterial pathogens. *Science* 360, 733–  
763 738. 10.1126/science.aar3777.
- 764 7. Luria, S.E., and Delbrück, M. (1943). MUTATIONS OF BACTERIA FROM VIRUS  
765 SENSITIVITY TO VIRUS RESISTANCE. *Genetics* 28, 491–511. 10.1093/genetics/28.6.491.
- 766 8. McKenzie, G.J., Harris, R.S., Lee, P.L., and Rosenberg, S.M. (2000). The SOS response  
767 regulates adaptive mutation. *Proc. Natl. Acad. Sci. U.S.A.* 97, 6646–6651.  
768 10.1073/pnas.120161797.
- 769 9. Ravikumar, A., Arzumanyan, G.A., Obadi, M.K.A., Javanpour, A.A., and Liu, C.C. (2018).  
770 Scalable, Continuous Evolution of Genes at Mutation Rates above Genomic Error  
771 Thresholds. *Cell* 175, 1946–1957.e13. 10.1016/j.cell.2018.10.021.
- 772 10. Masel, J., and Trotter, M.V. (2010). Robustness and Evolvability. *Trends in Genetics* 26,  
773 406–414. 10.1016/j.tig.2010.06.002.
- 774 11. Stajic, D., Bank, C., and Gordo, I. (2022). Adaptive Potential of Epigenetic Switching  
775 During Adaptation to Fluctuating Environments. *Genome Biology and Evolution* 14, evac065.  
776 10.1093/gbe/evac065.

- 777 12. Allis, C.D., and Jenuwein, T. (2016). The molecular hallmarks of epigenetic control. *Nat*  
778 *Rev Genet* 17, 487–500. 10.1038/nrg.2016.59.
- 779 13. Stajic, D., Perfeito, L., and Jansen, L.E.T. (2019). Epigenetic gene silencing alters the  
780 mechanisms and rate of evolutionary adaptation. *Nat Ecol Evol* 3, 491–498.  
781 10.1038/s41559-018-0781-2.
- 782 14. Casadesús, J., and Low, D. (2006). Epigenetic Gene Regulation in the Bacterial World.  
783 *Microbiol Mol Biol Rev* 70, 830–856. 10.1128/MMBR.00016-06.
- 784 15. Kussell, E., and Leibler, S. (2005). Phenotypic Diversity, Population Growth, and  
785 Information in Fluctuating Environments. *Science* 309, 2075–2078.  
786 10.1126/science.1114383.
- 787 16. Thattai, M., and van Oudenaarden, A. (2004). Stochastic Gene Expression in Fluctuating  
788 Environments. *Genetics* 167, 523–530. 10.1534/genetics.167.1.523.
- 789 17. Calo, S., Shertz-Wall, C., Lee, S.C., Bastidas, R.J., Nicolás, F.E., Granek, J.A.,  
790 Mieczkowski, P., Torres-Martínez, S., Ruiz-Vázquez, R.M., Cardenas, M.E., et al. (2014).  
791 Antifungal drug resistance evoked via RNAi-dependent epimutations. *Nature* 513, 555–558.  
792 10.1038/nature13575.
- 793 18. Guler, G.D., Tindell, C.A., Pitti, R., Wilson, C., Nichols, K., KaiWai Cheung, T., Kim, H.-  
794 J., Wongchenko, M., Yan, Y., Haley, B., et al. (2017). Repression of Stress-Induced LINE-1  
795 Expression Protects Cancer Cell Subpopulations from Lethal Drug Exposure. *Cancer Cell*  
796 32, 221-237.e13. 10.1016/j.ccell.2017.07.002.
- 797 19. Liao, B.B., Sievers, C., Donohue, L.K., Gillespie, S.M., Flavahan, W.A., Miller, T.E.,  
798 Venteicher, A.S., Hebert, C.H., Carey, C.D., Rodig, S.J., et al. (2017). Adaptive Chromatin  
799 Remodeling Drives Glioblastoma Stem Cell Plasticity and Drug Tolerance. *Cell Stem Cell*  
800 20, 233-246.e7. 10.1016/j.stem.2016.11.003.
- 801 20. Sharma, S.V., Lee, D.Y., Li, B., Quinlan, M.P., Takahashi, F., Maheswaran, S.,  
802 McDermott, U., Azizian, N., Zou, L., Fischbach, M.A., et al. (2010). A Chromatin-Mediated  
803 Reversible Drug-Tolerant State in Cancer Cell Subpopulations. *Cell* 141, 69–80.  
804 10.1016/j.cell.2010.02.027.
- 805 21. Torres-Garcia, S., Yaseen, I., Shukla, M., Audergon, P.N.C.B., White, S.A., Pidoux, A.L.,  
806 and Allshire, R.C. (2020). Epigenetic gene silencing by heterochromatin primes fungal  
807 resistance. *Nature* 585, 453–458. 10.1038/s41586-020-2706-x.
- 808 22. Halfmann, R., Jarosz, D.F., Jones, S.K., Chang, A., Lancaster, A.K., and Lindquist, S.  
809 (2012). Prions are a common mechanism for phenotypic inheritance in wild yeasts. *Nature*  
810 482, 363–368. 10.1038/nature10875.
- 811 23. True, H.L., and Lindquist, S.L. (2000). A yeast prion provides a mechanism for genetic  
812 variation and phenotypic diversity. *Nature* 407, 477–483. 10.1038/35035005.
- 813 24. David, L., Stolovicki, E., Haziz, E., and Braun, E. (2010). Inherited adaptation of genome-  
814 rewired cells in response to a challenging environment. *HFSP Journal* 4, 131–141.  
815 10.2976/1.3353782.
- 816 25. Freddolino, P.L., Yang, J., Momen-Roknabadi, A., and Tavazoie, S. (2018). Stochastic  
817 tuning of gene expression enables cellular adaptation in the absence of pre-existing  
818 regulatory circuitry. *eLife* 7, e31867. 10.7554/eLife.31867.

- 819 26. Kiani, K., Sanford, E.M., Goyal, Y., and Raj, A. (2022). Changes in chromatin  
820 accessibility are not concordant with transcriptional changes for single-factor perturbations.  
821 *Molecular Systems Biology* 18, e10979. 10.15252/msb.202210979.
- 822 27. Parmentier, R., Racine, L., Moussy, A., Chantalat, S., Sudharshan, R., Papili Gao, N.,  
823 Stockholm, D., Corre, G., Fourel, G., Deleuze, J.-F., et al. (2022). Global genome  
824 decompaction leads to stochastic activation of gene expression as a first step toward fate  
825 commitment in human hematopoietic cells. *PLoS Biol* 20, e3001849.  
826 10.1371/journal.pbio.3001849.
- 827 28. Shaffer, S.M., Emert, B.L., Reyes Hueros, R.A., Cote, C., Harmange, G., Schaff, D.L.,  
828 Sizemore, A.E., Gupte, R., Torre, E., Singh, A., et al. (2020). Memory Sequencing Reveals  
829 Heritable Single-Cell Gene Expression Programs Associated with Distinct Cellular  
830 Behaviors. *Cell* 182, 947-959.e17. 10.1016/j.cell.2020.07.003.
- 831 29. Shaffer, S.M., Dunagin, M.C., Torborg, S.R., Torre, E.A., Emert, B., Krepler, C., Beqiri,  
832 M., Sproesser, K., Brafford, P.A., Xiao, M., et al. (2017). Rare cell variability and drug-  
833 induced reprogramming as a mode of cancer drug resistance. *Nature* 546, 431–435.  
834 10.1038/nature22794.
- 835 30. Tagkopoulos, I., Liu, Y.-C., and Tavazoie, S. (2008). Predictive Behavior Within Microbial  
836 Genetic Networks. *Science* 320, 1313–1317. 10.1126/science.1154456.
- 837 31. Raj, A., and van Oudenaarden, A. (2008). Nature, Nurture, or Chance: Stochastic Gene  
838 Expression and Its Consequences. *Cell* 135, 216–226. 10.1016/j.cell.2008.09.050.
- 839 32. Audergon, P.N.C.B., Catania, S., Kagansky, A., Tong, P., Shukla, M., Pidoux, A.L., and  
840 Allshire, R.C. (2015). Restricted epigenetic inheritance of H3K9 methylation. *Science* 348,  
841 132–135. 10.1126/science.1260638.
- 842 33. Light, W.H., Brickner, D.G., Brand, V.R., and Brickner, J.H. (2010). Interaction of a DNA  
843 Zip Code with the Nuclear Pore Complex Promotes H2A.Z Incorporation and INO1  
844 Transcriptional Memory. *Molecular Cell* 40, 112–125. 10.1016/j.molcel.2010.09.007.
- 845 34. Park, M., Patel, N., Keung, A.J., and Khalil, A.S. (2019). Engineering Epigenetic  
846 Regulation Using Synthetic Read-Write Modules. *Cell* 176, 227-238.e20.  
847 10.1016/j.cell.2018.11.002.
- 848 35. Rangunathan, K., Jih, G., and Moazed, D. (2015). Epigenetic inheritance uncoupled from  
849 sequence-specific recruitment. *Science* 348, 1258699. 10.1126/science.1258699.
- 850 36. Sump, B., Brickner, D.G., D'Urso, A., Kim, S.H., and Brickner, J.H. (2022). Mitotically  
851 heritable, RNA polymerase II-independent H3K4 dimethylation stimulates INO1  
852 transcriptional memory. *eLife* 11, e77646. 10.7554/eLife.77646.
- 853 37. Allshire, R.C., and Madhani, H.D. (2018). Ten principles of heterochromatin formation  
854 and function. *Nat Rev Mol Cell Biol* 19, 229–244. 10.1038/nrm.2017.119.
- 855 38. Duempelmann, L., Mohn, F., Shimada, Y., Oberti, D., Andriollo, A., Lochs, S., and  
856 Bühler, M. (2019). Inheritance of a Phenotypically Neutral Epimutation Evokes Gene  
857 Silencing in Later Generations. *Molecular Cell* 74, 534-541.e4.  
858 10.1016/j.molcel.2019.02.009.
- 859 39. Gallagher, P.S., Larkin, M., Thillainadesan, G., Dhakshnamoorthy, J., Balachandran, V.,  
860 Xiao, H., Wellman, C., Chatterjee, R., Wheeler, D., and Grewal, S.I.S. (2018). Iron



- 861 homeostasis regulates facultative heterochromatin assembly in adaptive genome control.  
862 *Nat Struct Mol Biol* 25, 372–383. 10.1038/s41594-018-0056-2.
- 863 40. Halic, M., and Moazed, D. (2010). Dicer-Independent Primal RNAs Trigger RNAi and  
864 Heterochromatin Formation. *Cell* 140, 504–516. 10.1016/j.cell.2010.01.019.
- 865 41. Iglesias, N., Currie, M.A., Jih, G., Paulo, J.A., Siuti, N., Kalocsay, M., Gygi, S.P., and  
866 Moazed, D. (2018). Automethylation-induced conformational switch in Ctr4 (Suv39h)  
867 maintains epigenetic stability. *Nature* 560, 504–508. 10.1038/s41586-018-0398-2.
- 868 42. Kowalik, K.M., Shimada, Y., Flury, V., Stadler, M.B., Batki, J., and Bühler, M. (2015). The  
869 Paf1 complex represses small-RNA-mediated epigenetic gene silencing. *Nature* 520, 248–  
870 252. 10.1038/nature14337.
- 871 43. Parsa, J.-Y., Boudoukha, S., Burke, J., Homer, C., and Madhani, H.D. (2018).  
872 Polymerase pausing induced by sequence-specific RNA-binding protein drives  
873 heterochromatin assembly. *Genes Dev.* 32, 953–964. 10.1101/gad.310136.117.
- 874 44. Pisacane, P., and Halic, M. (2017). Tailing and degradation of Argonaute-bound small  
875 RNAs protect the genome from uncontrolled RNAi. *Nat Commun* 8, 15332.  
876 10.1038/ncomms15332.
- 877 45. Wei, Y., Lee, N.N., Pan, L., Dhakshnamoorthy, J., Sun, L.-L., Zofall, M., Wheeler, D., and  
878 Grewal, S.I.S. (2021). TOR targets an RNA processing network to regulate facultative  
879 heterochromatin, developmental gene expression and cell proliferation. *Nat Cell Biol* 23,  
880 243–256. 10.1038/s41556-021-00631-y.
- 881 46. Yamanaka, S., Mehta, S., Reyes-Turcu, F.E., Zhuang, F., Fuchs, R.T., Rong, Y., Robb,  
882 G.B., and Grewal, S.I.S. (2013). RNAi triggered by specialized machinery silences  
883 developmental genes and retrotransposons. *Nature* 493, 557–560. 10.1038/nature11716.
- 884 47. Wang, J., Reddy, B.D., and Jia, S. (2015). Rapid epigenetic adaptation to uncontrolled  
885 heterochromatin spreading. *eLife* 4, e06179. 10.7554/eLife.06179.
- 886 48. Basi, G., Schmid, E., and Maundrell, K. (1993). TATA box mutations in the  
887 *Schizosaccharomyces pombe* nmt1 promoter affect transcription efficiency but not the  
888 transcription start point or thiamine repressibility. *Gene* 123, 131–136. 10.1016/0378-  
889 1119(93)90552-E.
- 890 49. Kanke, M., Nishimura, K., Kanemaki, M., Kakimoto, T., Takahashi, T.S., Nakagawa, T.,  
891 and Masukata, H. (2011). Auxin-inducible protein depletion system in fission yeast. *BMC*  
892 *Cell Biol* 12, 8. 10.1186/1471-2121-12-8.
- 893 50. Lenski, R.E., Wiser, M.J., Ribbeck, N., Blount, Z.D., Nahum, J.R., Morris, J.J., Zaman, L.,  
894 Turner, C.B., Wade, B.D., Maddamsetti, R., et al. (2015). Sustained fitness gains and  
895 variability in fitness trajectories in the long-term evolution experiment with *Escherichia coli*.  
896 *Proc. R. Soc. B.* 282, 20152292. 10.1098/rspb.2015.2292.
- 897 51. Heins, Z.J., Mancuso, C.P., Kiriakov, S., Wong, B.G., Bashor, C.J., and Khalil, A.S.  
898 (2019). Designing Automated, High-throughput, Continuous Cell Growth Experiments Using  
899 eVOLVER. *JoVE*, 59652. 10.3791/59652.
- 900 52. Wong, B.G., Mancuso, C.P., Kiriakov, S., Bashor, C.J., and Khalil, A.S. (2018). Precise,  
901 automated control of conditions for high-throughput growth of yeast and bacteria with  
902 eVOLVER. *Nat Biotechnol* 36, 614–623. 10.1038/nbt.4151.

- 903 53. García-Ruano, D., Jain, A., Heins, Z.J., Wong, B.G., Yimer Wolle, E., Khalil, A.S., and  
904 Coudreuse, D. (2023). Long-term evolution of proliferating cells using the eVOLVER  
905 platform. *Open Biol.* 13, 230118. 10.1098/rsob.230118.
- 906 54. Huang, S. (2022). Towards a unification of the 2 meanings of “epigenetics.” *PLoS Biol*  
907 20, e3001944. 10.1371/journal.pbio.3001944.
- 908 55. Zhong, Z., Wong, B.G., Ravikumar, A., Arzumanyan, G.A., Khalil, A.S., and Liu, C.C.  
909 (2020). Automated Continuous Evolution of Proteins *in Vivo*. *ACS Synth. Biol.* 9, 1270–1276.  
910 10.1021/acssynbio.0c00135.
- 911 56. Zofall, M., Yamanaka, S., Reyes-Turcu, F.E., Zhang, K., Rubin, C., and Grewal, S.I.S.  
912 (2012). RNA Elimination Machinery Targeting Meiotic mRNAs Promotes Facultative  
913 Heterochromatin Formation. *Science* 335, 96–100. 10.1126/science.1211651.
- 914 57. Yaseen, I., White, S.A., Torres-Garcia, S., Spanos, C., Lafos, M., Gaberdiel, E., Yeboah,  
915 R., El Karoui, M., Rappsilber, J., Pidoux, A.L., et al. (2022). Proteasome-dependent  
916 truncation of the negative heterochromatin regulator Epe1 mediates antifungal resistance.  
917 *Nat Struct Mol Biol* 29, 745–758. 10.1038/s41594-022-00801-y.
- 918 58. Chen, D., Toone, W.M., Mata, J., Lyne, R., Burns, G., Kivinen, K., Brazma, A., Jones, N.,  
919 and Bähler, J. (2003). Global Transcriptional Responses of Fission Yeast to Environmental  
920 Stress. *MBoC* 14, 214–229. 10.1091/mbc.e02-08-0499.
- 921 59. Rubio, A., Ghosh, S., Mülleder, M., Ralser, M., and Mata, J. (2021). Ribosome profiling  
922 reveals ribosome stalling on tryptophan codons and ribosome queuing upon oxidative stress  
923 in fission yeast. *Nucleic Acids Research* 49, 383–399. 10.1093/nar/gkaa1180.
- 924 60. Ho, Y.-H., and Gasch, A.P. (2015). Exploiting the yeast stress-activated signaling  
925 network to inform on stress biology and disease signaling. *Curr Genet* 61, 503–511.  
926 10.1007/s00294-015-0491-0.
- 927 61. Egan, E.D., Braun, C.R., Gygi, S.P., and Moazed, D. (2014). Post-transcriptional  
928 regulation of meiotic genes by a nuclear RNA silencing complex. *RNA* 20, 867–881.  
929 10.1261/rna.044479.114.
- 930 62. Lee, N.N., Chalamcharla, V.R., Reyes-Turcu, F., Mehta, S., Zofall, M., Balachandran, V.,  
931 Dhakshnamoorthy, J., Taneja, N., Yamanaka, S., Zhou, M., et al. (2013). Mtr4-like Protein  
932 Coordinates Nuclear RNA Processing for Heterochromatin Assembly and for Telomere  
933 Maintenance. *Cell* 155, 1061–1074. 10.1016/j.cell.2013.10.027.
- 934 63. Dobrev, N., Ahmed, Y.L., Sivadas, A., Soni, K., Fischer, T., and Sinning, I. (2021). The  
935 zinc-finger protein Red1 orchestrates MTREC submodules and binds the Mtl1 helicase arch  
936 domain. *Nat Commun* 12, 3456. 10.1038/s41467-021-23565-3.
- 937 64. Foucher, A.-E., Touat-Todeschini, L., Juarez-Martinez, A.B., Rakitch, A., Laroussi, H.,  
938 Karczewski, C., Acajjaoui, S., Soler-López, M., Cusack, S., Mackereth, C.D., et al. (2022).  
939 Structural analysis of Red1 as a conserved scaffold of the RNA-targeting MTREC/PAXT  
940 complex. *Nat Commun* 13, 4969. 10.1038/s41467-022-32542-3.
- 941 65. Soni, K., Sivadas, A., Horvath, A., Dobrev, N., Hayashi, R., Kiss, L., Simon, B., Wild, K.,  
942 Sinning, I., and Fischer, T. (2023). Mechanistic insights into RNA surveillance by the  
943 canonical poly(A) polymerase Pla1 of the MTREC complex. *Nat Commun* 14, 772.  
944 10.1038/s41467-023-36402-6.

- 945 66. Pei, Y., Schwer, B., and Shuman, S. (2003). Interactions between Fission Yeast Cdk9,  
946 Its Cyclin Partner Pch1, and mRNA Capping Enzyme Pct1 Suggest an Elongation  
947 Checkpoint for mRNA Quality Control. *Journal of Biological Chemistry* 278, 7180–7188.  
948 10.1074/jbc.M211713200.
- 949 67. Parua, P.K., Booth, G.T., Sansó, M., Benjamin, B., Tanny, J.C., Lis, J.T., and Fisher,  
950 R.P. (2018). A Cdk9–PP1 switch regulates the elongation–termination transition of RNA  
951 polymerase II. *Nature* 558, 460–464. 10.1038/s41586-018-0214-z.
- 952 68. Anshabo, A.T., Milne, R., Wang, S., and Albrecht, H. (2021). CDK9: A Comprehensive  
953 Review of Its Biology, and Its Role as a Potential Target for Anti-Cancer Agents. *Front.*  
954 *Oncol.* 11, 678559. 10.3389/fonc.2021.678559.
- 955 69. Aygün, O., Mehta, S., and Grewal, S.I.S. (2013). HDAC-mediated suppression of histone  
956 turnover promotes epigenetic stability of heterochromatin. *Nat Struct Mol Biol* 20, 547–554.  
957 10.1038/nsmb.2565.
- 958 70. Johnsson, A., Durand-Dubief, M., Xue-Franzén, Y., Rönnerblad, M., Ekwall, K., and  
959 Wright, A. (2009). HAT–HDAC interplay modulates global histone H3K14 acetylation in  
960 gene-coding regions during stress. *EMBO Reports* 10, 1009–1014.  
961 10.1038/embor.2009.127.
- 962 71. Zofall, M., Sandhu, R., Holla, S., Wheeler, D., and Grewal, S.I.S. (2022). Histone  
963 deacetylation primes self-propagation of heterochromatin domains to promote epigenetic  
964 inheritance. *Nat Struct Mol Biol* 29, 898–909. 10.1038/s41594-022-00830-7.
- 965 72. Seman, M., Levashkevich, A., Larkin, A., Huang, F., and Ragunathan, K. (2023).  
966 Uncoupling the distinct functions of HP1 proteins during heterochromatin establishment and  
967 maintenance. *Cell Reports* 42, 113428. 10.1016/j.celrep.2023.113428.
- 968 73. Bitton, D.A., Schubert, F., Dey, S., Okoniewski, M., Smith, G.C., Khadayate, S.,  
969 Pancaldi, V., Wood, V., and Bähler, J. (2015). AnGeLi: A Tool for the Analysis of Gene Lists  
970 from Fission Yeast. *Front. Genet.* 6. 10.3389/fgene.2015.00330.
- 971 74. Hasan, A., Cotobal, C., Duncan, C.D.S., and Mata, J. (2014). Systematic Analysis of the  
972 Role of RNA-Binding Proteins in the Regulation of RNA Stability. *PLoS Genet* 10, e1004684.  
973 10.1371/journal.pgen.1004684.
- 974 75. Bao, K., Shan, C.-M., Chen, X., Raiymbek, G., Monroe, J.G., Fang, Y., Toda, T.,  
975 Koutmou, K.S., Ragunathan, K., Lu, C., et al. (2022). The cAMP signaling pathway regulates  
976 Epe1 protein levels and heterochromatin assembly. *PLoS Genet* 18, e1010049.  
977 10.1371/journal.pgen.1010049.
- 978 76. Hirai, H., Takemata, N., Tamura, M., and Ohta, K. (2022). Facultative heterochromatin  
979 formation in rDNA is essential for cell survival during nutritional starvation. *Nucleic Acids*  
980 *Research* 50, 3727–3744. 10.1093/nar/gkac175.
- 981 77. Ogura, M., Wakaiki, M., and Preciado, V.M. (2016). Dynamic analysis of bet-hedging  
982 strategies as a protection mechanism against environmental fluctuations. In 2016 IEEE 55th  
983 Conference on Decision and Control (CDC) (IEEE), pp. 4178–4183.  
984 10.1109/CDC.2016.7798903.
- 985 78. Cairns, J., Overbaugh, J., and Miller, S. (1988). The origin of mutants. *Nature* 335, 142–  
986 145. 10.1038/335142a0.



- 987 79. Rhind, N., Chen, Z., Yassour, M., Thompson, D.A., Haas, B.J., Habib, N., Wapinski, I.,  
988 Roy, S., Lin, M.F., Heiman, D.I., et al. (2011). Comparative Functional Genomics of the  
989 Fission Yeasts. *Science* 332, 930–936. 10.1126/science.1203357.
- 990 80. Thieme, E., Bruss, N., Sun, D., Dominguez, E.C., Coleman, D., Liu, T., Roleder, C.,  
991 Martinez, M., Garcia-Mansfield, K., Ball, B., et al. (2023). CDK9 inhibition induces epigenetic  
992 reprogramming revealing strategies to circumvent resistance in lymphoma. *Mol Cancer* 22,  
993 64. 10.1186/s12943-023-01762-6.
- 994 81. Sorida, M., Hirauchi, T., Ishizaki, H., Kaito, W., Shimada, A., Mori, C., Chikashige, Y.,  
995 Hiraoka, Y., Suzuki, Y., Ohkawa, Y., et al. (2019). Regulation of ectopic heterochromatin-  
996 mediated epigenetic diversification by the JmjC family protein Epe1. *PLoS Genet* 15,  
997 e1008129. 10.1371/journal.pgen.1008129.
- 998 82. Marina, D.B., Shankar, S., Natarajan, P., Finn, K.J., and Madhani, H.D. (2013). A  
999 conserved ncRNA-binding protein recruits silencing factors to heterochromatin through an  
1000 RNAi-independent mechanism. *Genes Dev.* 27, 1851–1856. 10.1101/gad.226019.113.
- 1001 83. Thillainadesan, G., Xiao, H., Holla, S., Dhakshnamoorthy, J., Jenkins, L.M.M., Wheeler,  
1002 D., and Grewal, S.I.S. (2020). Conserved protein Pir2ARS2 mediates gene repression  
1003 through cryptic introns in lncRNAs. *Nat Commun* 11, 2412. 10.1038/s41467-020-16280-y.
- 1004 84. Vo, T.V., Dhakshnamoorthy, J., Larkin, M., Zofall, M., Thillainadesan, G., Balachandran,  
1005 V., Holla, S., Wheeler, D., and Grewal, S.I.S. (2019). CPF Recruitment to Non-canonical  
1006 Transcription Termination Sites Triggers Heterochromatin Assembly and Gene Silencing.  
1007 *Cell Reports* 28, 267-281.e5. 10.1016/j.celrep.2019.05.107.
- 1008 85. Bühler, M., Spies, N., Bartel, D.P., and Moazed, D. (2008). TRAMP-mediated RNA  
1009 surveillance prevents spurious entry of RNAs into the *Schizosaccharomyces pombe* siRNA  
1010 pathway. *Nat Struct Mol Biol* 15, 1015–1023. 10.1038/nsmb.1481.
- 1011 86. Holoch, D., Wassef, M., Lövkvist, C., Zielinski, D., Aflaki, S., Lombard, B., Héry, T.,  
1012 Loew, D., Howard, M., and Margueron, R. (2021). A cis-acting mechanism mediates  
1013 transcriptional memory at Polycomb target genes in mammals. *Nat Genet* 53, 1686–1697.  
1014 10.1038/s41588-021-00964-2.
- 1015 87. Kramer, B.P., and Fussenegger, M. (2005). Hysteresis in a synthetic mammalian gene  
1016 network. *Proc. Natl. Acad. Sci. U.S.A.* 102, 9517–9522. 10.1073/pnas.0500345102.
- 1017 88. Tatarakis, A., Saini, H., and Moazed, D. (2023). Requirements for establishment and  
1018 epigenetic stability of mammalian heterochromatin (*Developmental Biology*)  
1019 10.1101/2023.02.27.530221.
- 1020
